# Supplementary material for: Association between urbanisation and the risk of hyperuricaemia among Chinese adults: a cross-sectional study from the China Health and Nutrition Survey (CHNS)
Source: PubMed Central journal article supplement — BMJ Open. 2021 Mar 10;11(3):e044905. doi: 10.1136/bmjopen-2020-044905 (PMC7949434; doi:10.1136/bmjopen-2020-044905), 2021-03-10
Supplement: bmjopen-2020-044905.draft_revisions.pdf [file bmjopen-2020-044905.draft_revisions.pdf]

# BMJ Open

BMJ Open is committed to open peer review. As part of this commitment we make the peer review history of every article we publish publicly available.

When an article is published we post the peer reviewers' comments and the authors' responses online. We also post the versions of the paper that were used during peer review. These are the versions that the peer review comments apply to.

The versions of the paper that follow are the versions that were submitted during the peer review process. They are not the versions of record or the final published versions. They should not be cited or distributed as the published version of this manuscript.

BMJ Open is an open access journal and the full, final, typeset and author-corrected version of record of the manuscript is available on our site with no access controls, subscription charges or pay-per-view fees (<http://bmjopen.bmj.com>).

If you have any questions on BMJ Open's open peer review process please email [info.bmjopen@bmj.com](mailto:info.bmjopen@bmj.com)

# BMJ Open

## Association between urbanization and the risk of hyperuricemia among Chinese adults: Findings from the China Health and Nutrition Survey

|                               |                                                                                                                                                                                                                                                                                                                                                                                                                                                                                                                                                       |
|-------------------------------|-------------------------------------------------------------------------------------------------------------------------------------------------------------------------------------------------------------------------------------------------------------------------------------------------------------------------------------------------------------------------------------------------------------------------------------------------------------------------------------------------------------------------------------------------------|
| Journal:                      | <i>BMJ Open</i>                                                                                                                                                                                                                                                                                                                                                                                                                                                                                                                                       |
| Manuscript ID                 | bmjopen-2020-044905                                                                                                                                                                                                                                                                                                                                                                                                                                                                                                                                   |
| Article Type:                 | Original research                                                                                                                                                                                                                                                                                                                                                                                                                                                                                                                                     |
| Date Submitted by the Author: | 17-Sep-2020                                                                                                                                                                                                                                                                                                                                                                                                                                                                                                                                           |
| Complete List of Authors:     | Yu, Xixi; Zhongshan Hospital Fudan University, Zhang, Han; Zhongshan Hospital Fudan University, Nephrology Shen, Ziyang; Zhongshan Hospital Fudan University, Nephrology Chen, Jing; Zhongshan Hospital Fudan University, Nephrology Gu, Yulu; Zhongshan Hospital Fudan University, Nephrology Lv, Shiqi; Zhongshan Hospital Fudan University, Nephrology Zhang, Di; Zhongshan Hospital Fudan University, Nephrology Zhang, Xiaoyan; Zhongshan Hospital Fudan University, Nephrology Ding, Xiaoqiang; Zhongshan Hospital Fudan University, Nephrology |
| Keywords:                     | PUBLIC HEALTH, EPIDEMIOLOGY, RHEUMATOLOGY                                                                                                                                                                                                                                                                                                                                                                                                                                                                                                             |
|                               |                                                                                                                                                                                                                                                                                                                                                                                                                                                                                                                                                       |

SCHOLARONE™  
Manuscripts

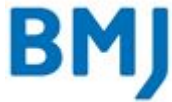

I, the Submitting Author has the right to grant and does grant on behalf of all authors of the Work (as defined in the below author licence), an exclusive licence and/or a non-exclusive licence for contributions from authors who are: i) UK Crown employees; ii) where BMJ has agreed a CC-BY licence shall apply, and/or iii) in accordance with the terms applicable for US Federal Government officers or employees acting as part of their official duties; on a worldwide, perpetual, irrevocable, royalty-free basis to BMJ Publishing Group Ltd ("BMJ") its licensees and where the relevant Journal is co-owned by BMJ to the co-owners of the Journal, to publish the Work in this journal and any other BMJ products and to exploit all rights, as set out in our [licence](#).

The Submitting Author accepts and understands that any supply made under these terms is made by BMJ to the Submitting Author unless you are acting as an employee on behalf of your employer or a postgraduate student of an affiliated institution which is paying any applicable article publishing charge ("APC") for Open Access articles. Where the Submitting Author wishes to make the Work available on an Open Access basis (and intends to pay the relevant APC), the terms of reuse of such Open Access shall be governed by a Creative Commons licence – details of these licences and which [Creative Commons](#) licence will apply to this Work are set out in our licence referred to above.

Other than as permitted in any relevant BMJ Author's Self Archiving Policies, I confirm this Work has not been accepted for publication elsewhere, is not being considered for publication elsewhere and does not duplicate material already published. I confirm all authors consent to publication of this Work and authorise the granting of this licence.

1  
2  
3  
4 **Association between urbanization and the risk of hyperuricemia among**  
5  
6 **Chinese adults: Findings from the China Health and Nutrition Survey**  
7

8  
9 Xixi Yu<sup>1,2#</sup>, Han Zhang<sup>1,2#</sup>, Ziyang Shen<sup>1,2</sup>, Jing Chen<sup>1,2</sup>, Yulu Gu<sup>1,2</sup>, Shiqi Lv<sup>1,2</sup>,  
10  
11 Di Zhang<sup>1,3</sup>, Xiaoqiang Ding<sup>1,2,3,4\*</sup>, Xiaoyan Zhang<sup>1,2</sup>,  
12

13  
14 <sup>1</sup> Department of Nephrology, Zhongshan Hospital, Fudan University, Shanghai,  
15  
16  
17 China.  
18

19 <sup>2</sup> Shanghai Medical Center of Kidney Disease, Shanghai, China.  
20

21 <sup>3</sup> Shanghai Key Laboratory of Kidney and Blood Purification, Shanghai, China.  
22

23 <sup>4</sup> Shanghai Institute of Kidney and Dialysis, Shanghai, China.  
24

25  
26  
27 # These authors contributed equally to this work  
28

29  
30 **Key words:** urbanization, hyperuricemia, the China Health and Nutrition  
31  
32 Survey  
33

34  
35 **Conflict of interest:** The authors have declared that no competing interests  
36  
37 exist.  
38

39  
40 **Corresponding author:**  
41

42  
43 Xiaoyan Zhang, Kidney and Dialysis Institute of Shanghai, No. 136 Medical  
44  
45 College Road, Shanghai 200032, China. E-mail: ZS\_XYZhang@163.com; Tel.  
46

47  
48 / fax: +86-21-64038472  
49

50  
51 Xiaoqiang Ding, Department of Nephrology, Zhongshan Hospital, Fudan  
52  
53 University, No. 180 Fenglin Road, Shanghai 200032, China. E-mail:  
54

55  
56 ding.xiaoqiang2015@hotmail.com; Tel. / fax: +86-21-64038472  
57

58  
59 **Running title:** urbanization and hyperuricemia  
60

1  
2  
3  
4 **Word counts:2607**

5  
6 **Abstract:232**

7  
8  
9 **number of references:40**

10  
11 **number of figures and tables:5**

12  
13  
14  
15  
16  
17 No additional data available.

18  
19  
20  
21  
22 **Abstract**

23  
24 **Background**

25  
26  
27 Hyperuricemia (HUA) has attracted worldwide concerns with its increasing  
28  
29 prevalence. Few studies have revealed the association between urbanicity and  
30  
31 HUA. The objective of this study is to explore whether urbanicity is an  
32  
33 independent risk factor of HUA in Chinese adults.  
34  
35

36  
37 **Methods**

38  
39  
40 The data we analyzed was extracted from the 2009 wave of the China Health  
41  
42 and Nutrition Survey. The population included 8579 participants aged 18 years  
43  
44 or older. According to urbanization index, we divided them into three categories  
45  
46 (low, medium and highly urbanized groups). HUA was defined as serum uric  
47  
48 acid  $\geq 7$  mg/dL in men and  $\geq 6$  mg/dL in women.  
49  
50  
51

52  
53 **Results**

54  
55  
56 The prevalence of HUA in low, medium and highly urbanized groups were  
57  
58 12.2%, 14.6% and 19.8%, respectively. The independent factors influencing  
59  
60

1  
2  
3  
4 serum uric acid included age, gender, hypertension, diabetes, chronic kidney  
5  
6 disease, drinking, obesity and community-level urbanization index. The risk of  
7  
8 HUA in highly urbanized group was significantly higher than that of the low  
9  
10 urbanized group (OR 1.661, 95%CI 1.246-2.212, P=0.001). In subgroup  
11  
12 analysis, we found that age, gender, comorbidity (such as hypertension,  
13  
14 diabetes, obesity and chronic kidney disease) and physical activities could  
15  
16 affect the association between urbanization and the risk of HUA.  
17  
18  
19  
20  
21

## 22 **Conclusions**

23  
24 Our findings suggest that living in highly urbanized area is linked with higher  
25  
26 risk of hyperuricemia independently of cardiometabolic and health-related  
27  
28 behavioral risk factors, which have been shown to increase along with  
29  
30 urbanization.  
31  
32  
33  
34  
35  
36  
37

## 38 **Strengths and limitations of this study**

- 39 ● This study explored the associations between urbanization and the risk of  
40  
41 hyperuricemia in adults that few studies had reported.  
42  
43
- 44 ● The data was extracted from the 2009 wave of the China Health and  
45  
46 Nutrition Survey including 8579 participants, represented 47% of China's  
47  
48 population and we found living in highly urbanized area is linked with higher  
49  
50 risk of hyperuricemia independently of other covariates, especially in males  
51  
52 without traditional hyperuricemia risk factors.  
53  
54  
55  
56  
57  
58  
59  
60

- This association in female group could be unavoidably affected when controlling for potential confounders in the binary logistics regression model, because the data of smoking in females missed a lot.
- Self-reported prevalence based on doctor diagnosis could be lower than the real prevalence of hypertension, diabetes mellitus, etc. and could affect the effects of urbanization.

## Introduction

In recent decades, with the changes in diet and lifestyle as the economy develops, the prevalence of hyperuricemia(HUA) increases rapidly[1], which was reported to be strongly associated with many diseases, such as cardiovascular disease[2], diabetes mellitus[3], hypertension[4], dyslipidemia[5], and chronic kidney disease[6]. According to a previous study, the prevalence of hyperuricemia in Chinese adults was 13.3% in 2014[7].

Urbanicity was confirmed to have an influence on health through nutrition and lifestyle choices, pollution, occupational and traffic hazards, sanitary condition such as health-care access and vaccination coverage[8, 9]. Several studies have found that pollution[10], drinking[11], smoking[12], reduced physical activity[13, 14], were all associated with HUA. Furthermore, some studies have found that urbanicity was related to renal function[15, 16].The cause of HUA includes increased urate generation, decreased urate excretion and both of the two. Two-thirds of the urate is excreted through the kidney into urine and the

1  
2  
3  
4 remaining one-third is excreted via the 'extra renal excretion' pathway[17].

5  
6 Reduced renal function can significantly increase the risk of hyperuricemia[18].

7  
8  
9 Then, whether urbanicity is a risk factor of HUA or not? Few studies had  
10  
11 reported the relationship between urbanicity and HUA.

12  
13  
14 To explore the association between urbanicity and hyperuricemia, we used data  
15  
16 from the China Health and Nutrition Survey (CHNS) and designed a multilevel  
17  
18 model to explore whether urbanicity is an independent risk factor of  
19  
20  
21  
22 hyperuricemia.  
23  
24  
25  
26

## 27 **Materials and Methods**

### 28 **Sampling and Participants**

29  
30  
31 Sampling in the present study came from the survey of China Health and  
32  
33 Nutrition Survey (CHNS) in 2009. The CHNS is a longitudinal study of nine  
34  
35 Chinese provinces (Guizhou, Guangxi, Heilongjiang, Henan, Hubei, Hunan,  
36  
37 Liaoning, Jiangsu and Shandong). Nine surveys have been conducted since  
38  
39 1989. By 2011, the provinces included in the CHNS sample represented 47%  
40  
41 of China's population (according to the census of 2010). The CHNS was  
42  
43 designed to provide representation of urban, suburban and rural areas, varying  
44  
45 significantly in economic development, public resources, geography and health  
46  
47 indicators, and to focus on health during urbanization and economic change[19].  
48  
49 We selected a stratified probability sample from the nine provinces using a  
50  
51 multistage, random-cluster design. Using this sampling strategy, we selected  
52  
53  
54  
55  
56  
57  
58  
59  
60



1  
2  
3  
4 two cities (one large city, usually the provincial capital, and one small city,  
5  
6 usually a lower income city) and four counties (stratified by income: one high,  
7  
8 one low, and two middle-income counties). Within cities, we randomly selected  
9  
10 two urban and two suburban communities; within counties, we randomly  
11  
12 selected one community in the capital city and three rural villages. In each  
13  
14 community, we selected 20 households in random and all household members  
15  
16 were interviewed. The 2009 wave consisted of 216 communities and included  
17  
18 36 urban neighborhoods, 36 suburban neighborhoods, 36 towns and 108  
19  
20 villages. Current study population included 8579 participants aged 18 years or  
21  
22 older and the selection procedures are depicted in Figure 1.  
23  
24  
25  
26  
27  
28  
29  
30  
31

### 32 **Urbanicity scale**

33  
34  
35 Urbanicity was defined using a 12-component index capturing community-level  
36  
37 physical, social, cultural and economic environments designed and validated  
38  
39 for the CHNS[20]. The following 12 components were included in the  
40  
41 development of the urbanization index: 1. population density; 2. types of  
42  
43 economic activity; 3. traditional market; 4. modern markets; 5. transportation and  
44  
45 infrastructure; 6. sanitation; 7. communications (e.g., TV, mobile, post, and  
46  
47 cinema); 8. housing (e.g., electricity, indoor tap water, and flush toilet); 9.  
48  
49 education; 10. diversity (i.e., variation in community education level and variation  
50  
51 in community income level); 11. health infrastructure; and 12. social services.  
52  
53  
54  
55  
56  
57  
58 This scale represents abroad-based measure of the elements of modernization  
59  
60

1  
2  
3  
4 that have potential health effects. Heterogeneity was captured by components  
5  
6 in the presence/absence or number of facilities within the community, access  
7  
8 to media or infrastructure, facility characteristics and the average proportion of  
9  
10 individuals and households having a specific education or income level. From  
11  
12 the CHNS household responses, we obtained the variables measuring  
13  
14 proportion of households. Furthermore, from the CHNS community-level survey  
15  
16 offered to community officials, we derived the remaining variables As described  
17  
18 by Jones-Smith and Popkin, scoring distributions were variable across  
19  
20 components, so they set the median score in a middle year as half the total  
21  
22 points and each of the components was scaled to 0–10. Each component was  
23  
24 then weighted equally in the overall index and added together for an overall  
25  
26 maximum possible score of 120. This scale has been validated for content  
27  
28 validity, reliability ( $\alpha=0.85\sim0.89$  across all study years), and stability across  
29  
30 study years( $r=0.90\sim0.94$ ).  
31  
32  
33  
34  
35  
36  
37  
38  
39  
40  
41  
42

### 43 **Definition of hyperuricemia**

44  
45 After at least 12 hours of overnight fasting, blood sample was collected by  
46  
47 venipuncture in the morning. 4 ml of the blood sample was collected into a tube  
48  
49 with separating gel, and was centrifuged 30 min after blood collection, at 3000×  
50  
51 g for 15 min; the serum sample obtained from the centrifugation was frozen and  
52  
53 stored at -86°C for later laboratory analysis. Another blood sample (500µL) was  
54  
55 collected into a tube with EDTA for routine blood examination. All samples were  
56  
57  
58  
59  
60

1  
2  
3  
4 verified and analyzed in a national central lab in Beijing (medical laboratory  
5  
6 accreditation certificate ISO 15189:2007) according to strict quality control  
7  
8 standard[21-23]. Serum uric acid (SUA) concentrations were measured with the  
9  
10 use of an enzymatic colorimetric method on a Hitachi 7600 automated analyzer  
11  
12 (Hitachi Inc., Tokyo, Japan) by determiner reagents (Randox Laboratories Ltd.,  
13  
14 Crumlin, UK). HUA was defined as SUA concentrations  $\geq 7$  mg/dL in men and  
15  
16  $\geq 6$  mg/dL in women[1, 24-26].  
17  
18  
19  
20  
21  
22  
23  
24

### 25 **Assessment of covariates**

26  
27 Self-reported medical history including hypertension, diabetes mellitus or high  
28  
29 blood sugar, and life style information such as smoking, drinking was collected  
30  
31 by trained interviewers. Hypertension was defined as either systolic pressure  $\geq$   
32  
33 140 mmHg, diastolic pressure  $\geq 90$  mmHg or self-reported diagnosis of  
34  
35 hypertension[27]. Diabetes mellitus (DM) was defined as either fasting blood  
36  
37 glucose  $\geq 126$  mg/dL (7.0 mmol/L) or glycosylated hemoglobin  $\geq 6.5\%$  or self-  
38  
39 reported diagnosis of DM[28]. High level of low-density lipoprotein cholesterol  
40  
41 (LDL-c) was defined as  $\geq 3.12$  mmol/L[29]. To accurately estimate the kidney  
42  
43 function, we referred to CKD-EPI equation to calculate the estimated glomerular  
44  
45 filtration rate (eGFR):  $eGFR = 141 \times \min(SCr/\kappa, 1)^\alpha \times \max(SCr/\kappa, 1)^{-1.209} \times 0.993$   
46  
47  $Age \times 1.021$  [if female]  $\times 1.159$  [if black], where SCr is serum creatinine,  $\kappa$  is 0.7  
48  
49 for females and 0.9 for males,  $\alpha$  is -0.329 for females and -0.411 for males, min  
50  
51 indicates the minimum of SCr/ $\kappa$  or 1, and max indicates the maximum of SCr/ $\kappa$   
52  
53  
54  
55  
56  
57  
58  
59  
60

1  
2  
3  
4 or 1[30]. Chronic kidney disease(CKD) was defined as eGFR < 60 ml/min/1.73  
5  
6 m<sup>2</sup> according to Kidney Disease: Improving Global Outcomes (KDIGO) 2012  
7  
8 Clinical Practice Guideline for the Evaluation and Management of Chronic  
9  
10 Kidney Disease[30]. From physical examination, we obtained the participants'  
11  
12 body weight and height. Body mass index (BMI) was calculated as weight(kg)  
13  
14 divided by height squared, and was classified into normal (BMI< 28.0), and  
15  
16 obese (BMI ≥ 28.0)[31].

17  
18  
19  
20  
21  
22 Physical activity included domestic activity(such as washing clothes, buying  
23  
24 food for the family), occupation activity, transportation activity (such as walking  
25  
26 to work or going to work by car), leisure activity (such as Kung fu, swimming,  
27  
28 playing football)[32, 33], which was estimated by metabolic equivalent for task  
29  
30 (MET). MET is a unit that estimates the amount of energy used by the body  
31  
32 during physical activity, as compared to resting metabolism. The unit is  
33  
34 standardized so it can apply to people of varying body weight and compare  
35  
36 different activities[34]. The data of alcohol consumption and smoking situation  
37  
38 of the participants also could be attained from CHNS and was classified into  
39  
40 "yes" (≥ once per week) and "no" (<once per week) in our analysis.  
41  
42  
43  
44  
45  
46  
47  
48  
49

### 50 51 **Statistical analysis**

52  
53 Continuous variables were presented as means ± standard deviation (SD),  
54  
55 while frequencies and percentages were used as categorical variables. The  
56  
57 one-way ANOVA test (for continuous variables) and  $\chi^2$  tests (for categorical  
58  
59  
60

1  
2  
3  
4 variables) were used to compare the difference of HUA, age, gender,  
5  
6 cardiometabolic risk factors (hypertension, diabetes mellitus, high level of LDL-  
7  
8 c, obesity, CKD) and health-related behaviors (drinking, smoking, physical  
9  
10 activity) among groups, respectively. And then the associations of uric acid with  
11  
12 variables were tested using Spearman correlation coefficients in unadjusted  
13  
14 and multivariable-adjusted linear regression models.  
15  
16  
17

18  
19 The method of maximum likelihood by the binary logistics regression model,  
20  
21 was used to analyze the relationship between the risk of HUA in adulthood and  
22  
23 community-level urbanization exposure. In the multivariable logistic regression  
24  
25 model, we adjusted for age, gender, CKD, health-related behaviors and  
26  
27 cardiometabolic risk factors. Model 1 was only controlled by age and gender,  
28  
29 Model 2 was controlled for factors from model 1 plus cardiometabolic risk  
30  
31 factors (obesity, hypertension, DM, high LDL, obesity and CKD). For Model 3,  
32  
33 health-related behaviors (smoking, drinking, physical activity) were added for  
34  
35 adjustment. All statistical analysis was conducted using the Statistical Package  
36  
37 for the Social Sciences 13.0(SPSS Inc., Chicago, IL, USA). The data was  
38  
39 demonstrated as odds ratio (OR) and 95% confidence interval (CI). A two-side  
40  
41 p value <0.05 was considered significant.  
42  
43  
44  
45  
46  
47  
48  
49  
50  
51

## 52 53 **Results**

### 54 55 **Characteristics of participants by tertiles of community-level urbanization** 56 57 58 **index** 59 60

1  
2  
3  
4 A total of 8579 participants were enrolled into the current study. Basic  
5  
6 characteristics of the participants are presented in Table 1. Since the  
7  
8 community-level urbanization indexes ranged from 30.4 to 106.6, all  
9  
10 participants were divided into low ( $<55.01$ ), medium ( $\geq 55.01$  and  $<82.33$ ) and  
11  
12 highly ( $\geq 82.33$ ) urbanized groups by their community-level urbanization index  
13  
14 tertiles accordingly. The prevalence of HUA rose with the urbanization scale  
15  
16 (from 12.2% to 14.6% to 19.8%,  $p < 0.001$ ), the same as the trend of mean SUA  
17  
18 levels (from 5.02 to 5.16 to 5.42,  $p < 0.001$ ).

19  
20  
21  
22  
23  
24 With the increasing of the urbanization index, renal function declined  
25  
26 dramatically (eGFR reduced from 81.98 to 78.71 to 76.57,  $p < 0.001$ ). In terms  
27  
28 of cardiometabolic risk factors, subjects who lived in more urbanized  
29  
30 communities were prone to hypertension, diabetes mellitus, high LDL-c and  
31  
32 obesity. For the perspective of health-related behaviors, those subjects from  
33  
34 higher urbanized areas tended to smoke less, drink less and be less physically  
35  
36 active compared with lower urbanized areas.  
37  
38  
39  
40  
41  
42  
43  
44  
45  
46

### 47 **Risk factors associated with serum uric acid among Chinese adults**

48 Table 2 shows the results of the univariable and multivariable linear regression  
49  
50 analyses between serum uric acid and age, gender, cardiometabolic risk factors  
51  
52 and health-related behaviors. The independent factors influencing serum uric  
53  
54 acid included age, gender, hypertension, DM, obesity, CKD, drinking, and  
55  
56 community-level urbanization index. Males, drinking individuals, individuals  
57  
58  
59  
60

1  
2  
3  
4 with cardiometabolic risk factors (such as hypertension, diabetes, obesity and  
5  
6 CKD), and individuals who lived in a community with higher urbanization index  
7  
8  
9 tended to have higher serum uric acid.  
10

### 11 12 13 14 **Association of urbanization and the risk of hyperuricemia among Chinese** 15 16 17 **adults**

18  
19 The association of urbanization with HUA in Chinese adults is demonstrated in  
20  
21 Table 3. Compared with low urbanized group, the prevalence of HUA in medium  
22  
23 and highly urbanized groups showed significant difference in univariate  
24  
25 analysis, as shown in Table 1. We found even after adjusted by age, gender,  
26  
27 cardiometabolic risk factors and health-related behaviors, the highly urbanized  
28  
29 group still had higher risk of HUA compared with low urbanized group (OR  
30  
31 1.661, 95%CI 1.246-2.212, P=0.001). Furthermore, by subgroup analysis of the  
32  
33 low and highly urbanized, age, gender, comorbidities (such as hypertension,  
34  
35 diabetes, obesity and CKD) and physical activity were suggested to affect the  
36  
37 association between urbanization and the risk of HUA (Figure 2). Young and  
38  
39 middle-aged males living in the community with higher community-level  
40  
41 urbanization index were prone to higher risk of HUA. Such association also  
42  
43 existed in individuals without hypertension, diabetes, obesity or CKD and  
44  
45 individuals with less physical activity.  
46  
47  
48  
49  
50  
51  
52  
53  
54  
55  
56  
57

### 58 **Discussion**

59  
60

1  
2  
3  
4 In the current study, we found that individuals living in higher urbanized areas  
5  
6 were prone to higher risk of HUA. The association between urbanicity and HUA  
7  
8 still remained after adjusted age, gender, cardiometabolic and health-related  
9  
10 behavioral risk factors.  
11  
12

13  
14 Several potential mechanisms could explain the associations between high  
15  
16 urbanicity and HUA. High urbanicity means high pollution. There is larger  
17  
18 amount of motor vehicles in highly urbanized areas, and the vehicle emissions  
19  
20 including ozone and respirable particles contribute to air pollution. For example,  
21  
22 in highly urbanized area like Beijing, motor vehicles grows by more than 1000  
23  
24 per day (mainly produced from coal) which would lead severe air pollution[35].  
25  
26 Previous studies have confirmed that the air pollution contained toxic organic  
27  
28 agents including polychlorinated biphenyls (PCBs), polycyclic aromatic  
29  
30 hydrocarbons (PAHs), perfluorinated alkyl substances(PFASa), and dioxins,  
31  
32 which could increase serum uric acid concentrations and the incidence of  
33  
34 HUA[36]. Exposure to greater concentrations of long-term ambient air  
35  
36 pollutants has been confirmed to be associated with a higher incidence of  
37  
38 hyperuricemia[10].  
39  
40  
41  
42  
43  
44  
45  
46  
47

48 High urbanicity is accompanied with less physical activity. As found in our study,  
49  
50 the physical activity declined with the increase of urbanicity. In high urbanized  
51  
52 areas, occupational physical activity is less common, as well as the  
53  
54 transportation and domestic activity, as the popularization of motorized  
55  
56 transport and labor-saving household appliances[37]. Physical exercise is  
57  
58  
59  
60



1  
2  
3  
4 closely interacted with serum uric acid. It was reported that SUA of the  
5  
6 professional endurance athletes were significantly lower than non-athletes[38].  
7  
8 After aerobic exercise, serum uric acid increased immediately and then  
9  
10 decreased to a level even lower than pre-exercise level[39], because energy-  
11  
12 rich purine phosphates are transiently accumulated and catabolized, following  
13  
14 by the lasting-long depletion. In our study, we also confirmed that, with  
15  
16 adequate physical activities, individuals living in lower and higher urbanized  
17  
18 communities have comparative risk of HUA.  
19  
20  
21  
22  
23

24 High urbanicity means worse kidney function. A study including a large amount  
25  
26 of population revealed that the higher risk of CKD in the higher urbanicity  
27  
28 community[40]. Kidney is the most important organ to excrete uric acid and  
29  
30 kidney function is closely related to SUA.  
31  
32  
33

34 Urbanization has close association with other non-communicable diseases,  
35  
36 such as diabetes, hypertension, high LDL-c, cardiovascular disease, cancer,  
37  
38 and neuropsychiatric disorders with the changes in patterns of human activity,  
39  
40 diet, and social structures in China[9]. These diseases can also increase the  
41  
42 risk of HUA in some specific ways[1-4].  
43  
44  
45  
46  
47

48 In addition, we also found that age, gender, comorbidity (such as hypertension,  
49  
50 diabetes, obesity and CKD) and physical activity could affect the association  
51  
52 between urbanization and the risk of HUA. Young and middle-aged men living  
53  
54 in the community with high community-level urbanization index are prone to  
55  
56 higher risk of HUA. Such association also exists in individuals without  
57  
58  
59  
60

1  
2  
3  
4 hypertension, diabetes, obesity and CKD and in individuals with less physical  
5  
6 activity, suggesting that in high urbanized area, individuals without traditional  
7  
8 HUA risk factors still have higher risk of HUA. The interaction between  
9  
10 urbanicity and hypertension, diabetes, obesity and CKD might conceal the  
11  
12 relationship between urbanicity and HUA in these subgroups.  
13  
14  
15

16  
17 The strengths of our study are : first, the data we analyzed in our survey was  
18  
19 extracted from the CHNS including nine provinces which are widely  
20  
21 representative of the entire Chinese mainland. Second, the innovative grouping  
22  
23 and stratifying methods make it clarified to distinguish the exact stage in which  
24  
25 urbanicity exerts influences on HUA.  
26  
27  
28

29  
30 Our study also has some findings counter-intuitive. First, elderly individuals in  
31  
32 our study tend to have lower serum uric acid. Reduced kidney function,  
33  
34 hypertension and diabetes could increase the risk of HUA, and are common in  
35  
36 elderly individuals. However, elderly individuals usually diet less purine-rich  
37  
38 food, pay more attention to health-related diet and behaviors than young  
39  
40 individuals. Effective diet control can reduce serum uric acid by 60~70 $\mu$ mol/L,  
41  
42 which can partly explain the relationship between age and serum uric acid.  
43  
44  
45

46  
47 Second, the association between urbanicity and HUA after adjusting  
48  
49 cardiometabolic and health-related behavioral risk factors only exists in men.  
50  
51

52  
53 For the perspective of health-related behaviors, female individuals tend to  
54  
55 smoke less, drink less and be more inactive compared with male individuals.  
56  
57  
58  
59  
60

1  
2  
3  
4 In conclusion, living in high urbanized area is linked with higher risk of  
5  
6 hyperuricemia independently of health-related behavioral and cardiometabolic  
7  
8 risk factors, especially in individuals without traditional HUA risk factors, such  
9  
10 as hypertension, diabetes mellitus, obesity or CKD.  
11  
12  
13  
14  
15  
16

### 17 **Acknowledgements**

18  
19 We would like to acknowledge the team of the National Institute for Nutrition  
20  
21 and Health, Chinese Center for Disease Control and Prevention, the Carolina  
22  
23 Population Center, University of North Carolina at Chapel Hill, and the China–  
24  
25 Japan Friendship Hospital, Ministry of Health who conducted the China Health  
26  
27 and Nutrition Survey 2009. And we also acknowledge all the participants  
28  
29 included in this study.  
30  
31  
32  
33  
34  
35  
36  
37

### 38 **Ethics**

39  
40 The research was approved by the Institutional Review Board at the University  
41  
42 of North Carolina at Chapel Hill, the China-Japan Friendship Hospital and the  
43  
44 Chinese Center for Disease Control and Prevention's National Institute for  
45  
46 Nutrition and Health. All subjects gave informed consent for participation. The  
47  
48 work presented in this paper was approved by the ethics committee of  
49  
50 Zhongshan Hospital and the approval number is B2018-166.  
51  
52  
53  
54  
55  
56  
57

### 58 **Patient and Public Involvement statement**

59  
60

1  
2  
3  
4 Patients and public will not be involved in the development of the research  
5  
6 question or in the design of the study. Patients will receive oral and written  
7  
8 information about this research; however, they will not be involved in the  
9  
10 recruitment and conduct of the study. After signing an informed consent by the  
11  
12 participants, they will be assessed for eligibility and data collection will begin.  
13  
14  
15  
16  
17 Dissemination of the general results (no personal data) will be made on demand.  
18  
19  
20  
21

## 22 **Contributors**

23  
24 ZXY and DXQ were co-investigators and designed the study, YXX, ZH and SZY  
25  
26 carried out the initial analysis, and supervised data analysis. All authors were  
27  
28 involved in writing the paper and had final approval of the submitted and  
29  
30 published versions.  
31  
32  
33  
34  
35  
36  
37

## 38 **Data sharing statement**

39  
40 The datasets analyzed in the current study are available online  
41  
42 (<https://www.cpc.unc.edu/projects/china>).  
43  
44  
45  
46  
47

## 48 **Competing Interests: None**

## 53 **Funding**

54  
55 This study was supported by research grants from the Ministry of Science and  
56  
57 Technology of People's Republic of China (2016YFC1305500), Shanghai  
58  
59  
60

1  
2  
3  
4 Municipal Health Commission (2017ZZ01015), and the China National Natural  
5  
6 Scientific Foundation (81700646 and 81970637). The funders had no roles in  
7  
8 study design, data collection and analysis, decision to publish, or preparation  
9  
10 of the manuscript.  
11  
12  
13  
14  
15  
16  
17  
18

## 19 20 21 22 23 24 25 26 27 28 29 30 31 32 33 34 35 36 37 38 39 40 41 42 43 44 45 46 47 48 49 50 51 52 53 54 55 56 57 58 59 60

### References

- 1 Zhu Y, Pandya BJ, Choi HK. Prevalence of gout and hyperuricemia in the US general  
2 population: The National Health and Nutrition Examination Survey 2007–2008. *Arthritis Rheum*  
3 2011;**63**:3136-41.
- 2 Feig DI, Kang D-H, Johnson RJ. Uric Acid and Cardiovascular Risk. *N Engl J Med*  
4 2008;**359**:1811-21.
- 3 Sluijs I, Beulens JWJ, van der A DL, *et al.* Plasma Uric Acid Is Associated with Increased  
4 Risk of Type 2 Diabetes Independent of Diet and Metabolic Risk Factors. *The Journal of*  
5 *Nutrition* 2012;**143**:80-5.
- 4 Ali N, Mahmood S, Islam F, *et al.* Relationship between serum uric acid and hypertension:  
6 a cross-sectional study in Bangladeshi adults. *Sci Rep* 2019;**9**:9061.
- 5 Peng T-C, Wang C-C, Kao T-W, *et al.* Relationship between hyperuricemia and lipid  
6 profiles in US adults. *BioMed research international* 2015;**2015**:127596-.
- 6 Tsumuraya Y, Hirayama T, Tozuka E, *et al.* Impact of hyperuricaemia on the chronic  
7 kidney disease-associated risk factors in a community-based population. *Nephrology*  
8 2015;**20**:399-404.

- 1  
2  
3  
4 7 Liu R, Han C, Wu D, *et al*. Prevalence of Hyperuricemia and Gout in Mainland China from  
5  
6 2000 to 2014: A Systematic Review and Meta-Analysis. *BioMed research international*  
7  
8 2015;**2015**:762820-.
- 9  
10  
11 8 Vlahov D, Galea S. Urbanization, urbanicity, and health. *Journal of urban health : bulletin*  
12  
13 *of the New York Academy of Medicine* 2002;**79**:S1-S12.
- 14  
15  
16 9 Gong P, Liang S, Carlton EJ, *et al*. Urbanisation and health in China. *The Lancet*  
17  
18 2012;**379**:843-52.
- 19  
20  
21 10 Tang Y-X, Bloom MS, Qian Z, *et al*. Association between ambient air pollution and  
22  
23 hyperuricemia in traffic police officers in China: a cohort study. *Int J Environ Health Res* 2019:1-  
24  
25 9.
- 26  
27  
28 11 Nakamura K, Sakurai M, Miura K, *et al*. Alcohol intake and the risk of hyperuricaemia: A  
29  
30 6-year prospective study in Japanese men. *Nutrition, Metabolism and Cardiovascular Diseases*  
31  
32 2012;**22**:989-96.
- 33  
34  
35 12 Yang T, Zhang Y, Wei J, *et al*. Relationship between cigarette smoking and hyperuricemia  
36  
37 in middle-aged and elderly population: a cross-sectional study. *Rheumatol Int* 2016;**37**:131-6.
- 38  
39  
40 13 Liu, Li, Zhang, *et al*. Relationship between lifestyle choices and hyperuricemia in Chinese  
41  
42 men;and women. *Clin Rheumatol* 2013;**32**:233-9.
- 43  
44  
45 14 Veronese N, Stubbs B, Trevisan C, *et al*. Results of an Observational Cohort Study of  
46  
47 Hyperuricemia as a Predictor of Poor Physical Performance in the Elderly. *Arthritis Care Res*  
48  
49 *(Hoboken)* 2017;**69**:1238-44.  
50  
51  
52  
53  
54  
55  
56  
57  
58  
59  
60

- 1  
2  
3  
4 15 Wang S, Chen R, Liu Q, *et al.* Prevalence, awareness and treatment of chronic kidney  
5  
6 disease among middle-aged and elderly: The China Health and Retirement Longitudinal Study.  
7  
8  
9 *Nephrology* 2015;**20**:474-84.  
10  
11  
12 16 Kaze FF, Meto DT, Halle M-P, *et al.* Prevalence and determinants of chronic kidney  
13  
14 disease in rural and urban Cameroonians: a cross-sectional study. *BMC Nephrol* 2015;**16**:117.  
15  
16  
17 17 Sorensen LB. Role of the intestinal tract in the elimination of uric acid.  
18  
19  
20 18 Krishnan E. Reduced glomerular function and prevalence of gout: NHANES 2009-10.  
21  
22  
23 19 Popkin BM, Du S, Zhai F, *et al.* Cohort Profile: The China Health and Nutrition Survey—  
24  
25 monitoring and understanding socio-economic and health change in China, 1989–2011. *Int J*  
26  
27 *Epidemiol* 2009;**39**:1435-40.  
28  
29  
30 20 Jones-Smith JC, Popkin BM. Understanding community context and adult health changes  
31  
32 in China: Development of an urbanicity scale. *Soc Sci Med* 2010;**71**:1436-46.  
33  
34  
35 21 Yiqiang Z, Ruoqing C, Wenwen Z, *et al.* Association between serum magnesium and  
36  
37 anemia: china health and nutrition survey. *Biol Trace Elem Res* 2014;**159**:39-45.  
38  
39  
40 22 Yan S, Li J, Li S, *et al.* The expanding burden of cardiometabolic risk in China: the China  
41  
42 Health and Nutrition Survey. *Obes Rev* 2012;**13**:810-21.  
43  
44  
45 23 Han L-l, Wang Y-x, Li J, *et al.* Gender differences in associations of serum ferritin and  
46  
47 diabetes, metabolic syndrome, and obesity in the China Health and Nutrition Survey. *Mol Nutr*  
48  
49 *Food Res* 2014;**58**:2189-95.  
50  
51  
52  
53 24 Becker MA, Schumacher HR, Wortmann RL, *et al.* Febuxostat Compared with Allopurinol  
54  
55 in Patients with Hyperuricemia and Gout. *N Engl J Med* 2005;**353**:2450-61.  
56  
57  
58  
59  
60

- 1  
2  
3  
4 25 Zhang W, Doherty M, Pascual E, *et al*. EULAR evidence based recommendations for gout.  
5  
6  
7 Part I: Diagnosis. Report of a task force of the standing committee for international clinical  
8  
9  
10 studies including therapeutics (ESCISIT). *Ann Rheum Dis* 2006;**65**:1301.
- 11  
12 26 Perez-Ruiz F, Lioté F. Lowering serum uric acid levels: What is the optimal target for  
13  
14 improving clinical outcomes in gout? *Arthritis Care Res (Hoboken)* 2007;**57**:1324-8.
- 15  
16  
17 27 Williams B, G M, W S, *et al*. [2018 ESC/ESH Guidelines for the management of arterial  
18  
19 hypertension]. *Eur Heart J* 2019;**77**:71.
- 20  
21  
22 28 5. Lifestyle Management: &em& Standards of Medical Care in Diabetes—  
23  
24 2019&em&. *Diabetes Care* 2019;**42**:S46.
- 25  
26  
27 29 Mach F, Baigent C, Catapano A, *et al*. 2019 ESC/EAS guidelines for the management of  
28  
29 dyslipidaemias: Lipid modification to reduce cardiovascular risk. *Atherosclerosis* 2019.
- 30  
31  
32 30 Andrassy KM. Comments on 'KDIGO 2012 Clinical Practice Guideline for the Evaluation  
33  
34 and Management of Chronic Kidney Disease'. *Kidney Int* 2013;**84**:622-3.
- 35  
36  
37 31 Zhou BF. Effect of Body Mass Index on All-cause Mortality and Incidence of  
38  
39 Cardiovascular Diseases—Report for Meta-Analysis of Prospective Studies on Optimal Cut-off  
40  
41 Points of Body Mass Index in Chinese Adults. *Biomed Environ Sci* 2002;**15**:245.
- 42  
43  
44 32 Ainsworth BE, Haskell WL, Whitt MC, *et al*. Compendium of Physical Activities: an Update  
45  
46 of Activity Codes and MET Intensities. *Med Sci Sports Exerc* 2000;**32**:S498-504.
- 47  
48  
49 33 Ng SW, Norton EC, Popkin BM. Why have physical activity levels declined among Chinese  
50  
51 adults? Findings from the 1991–2006 China health and nutrition surveys. *Soc Sci Med*  
52  
53  
54 2009;**68**:1305-14.  
55  
56  
57  
58  
59  
60



- 1  
2  
3  
4 34 Sallis JF, Haskell WL, Wood PD, *et al.* Physical activity assessment methodology in the  
5  
6 Five-City Project. *Am J Epidemiol* 1985;**121**:91-106.  
7  
8  
9 35 Anderson H, Atkinson R, Chen B, *et al.* Special Report 15: Health effects of outdoor air  
10  
11 pollution in developing countries of Asia. 2004.  
12  
13  
14 36 Jung-Wei C, Horng-Yih O, Hsiu-Ling C, *et al.* Hyperuricemia after exposure to  
15  
16 polychlorinated dibenzo-p-dioxins and dibenzofurans near a highly contaminated area.  
17  
18  
19 *Epidemiology* 2013;**24**:582-9.  
20  
21  
22 37 Monda KL, Gordon-Larsen P, Stevens J, *et al.* China's transition: The effect of rapid  
23  
24 urbanization on adult occupational physical activity. *Soc Sci Med* 2007;**64**:858-70.  
25  
26  
27 38 Giuseppe L, Giorgio B, Massimo F, *et al.* Comparison of serum creatinine, uric acid,  
28  
29 albumin and glucose in male professional endurance athletes compared with healthy controls.  
30  
31  
32 *Clin Chem Lab Med* 2004;**42**:644-7.  
33  
34  
35 39 Shi M, Wang X, Yamanaka T, *et al.* Effects of anaerobic exercise and aerobic exercise on  
36  
37 biomarkers of oxidative stress. *Environ Health Prev Med* 2007;**12**:202-8.  
38  
39  
40 40 Inoue Y, Howard AG, Thompson AL, *et al.* The association between urbanization and  
41  
42 reduced renal function: findings from the China Health and Nutrition Survey. *BMC Nephrol*  
43  
44  
45 2017;**18**:160.  
46  
47  
48  
49  
50  
51  
52  
53  
54  
55  
56  
57  
58  
59  
60

**Table 1 Basic characteristics of participants according to community-level urbanization index**

| Variables                                             | Low urbanized  | Medium urbanized | Highly urbanized | P value |
|-------------------------------------------------------|----------------|------------------|------------------|---------|
| <b>Number</b>                                         | 3554           | 2162             | 2863             |         |
| <b>SUA, mean (SD), <math>\mu\text{mol/L}</math></b>   | 5.02(1.69)     | 5.16(1.75)       | 5.42 (1.87)      | <0.001  |
| <b>HUA, n (%)</b>                                     | 435(12.2)      | 316(14.6)        | 567(19.8)        | <0.001  |
| <b>Age, mean (SD), year</b>                           | 50.29(14.76)   | 50.50(14.94)     | 52.15(15.37)     | <0.001  |
| <b>Male, n (%)</b>                                    | 1696(47.7)     | 1020(47.2)       | 1327(46.3)       | 0.549   |
| <b>Hypertension, n (%)</b>                            | 1169(32.9)     | 753(34.8)        | 1069(37.3)       | 0.001   |
| <b>DM, n (%)</b>                                      | 296(8.3)       | 258(11.9)        | 374(13.1)        | <0.001  |
| <b>High LDL-c, n (%)</b>                              | 1209(34.6)     | 1000(46.3)       | 1261(44.0)       | <0.001  |
| <b>Obesity, n (%)</b>                                 | 298(8.4)       | 212(9.8)         | 312(10.9)        | <0.001  |
| <b>eGFR, mean (SD), mL/min per 1.73 m<sup>2</sup></b> | 81.98(16.46)   | 78.71(16.88)     | 76.57(16.94)     | <0.001  |
| <b>CKD, n (%)</b>                                     | 307(8.6)       | 255(11.8)        | 437(15.3)        | <0.001  |
| <b>Smoking, n (%)</b>                                 | 1108(31.2)     | 558(25.8)        | 708(24.7)        | <0.001  |
| <b>Drinking, n (%)</b>                                | 791(22.3)      | 458(21.2)        | 536(18.7)        | <0.001  |
| <b>Physical activity, mean (SD), METs</b>             | 125.48(123.73) | 81.53(101.49)    | 51.71(72.26)     | <0.001  |

Continuous variables were expressed as the mean  $\pm$  SD and categorical variables were described as frequencies and percentages. The one-way ANOVA test (for continuous

variables) and  $\chi^2$  tests (for categorical variables) were used to compare the difference between different group. SUA, serum uric acid; HUA: hyperuricemia; DM, Diabetes mellitus;

LDL, low-density lipoprotein; eGFR, estimated glomerular filtration rate; CKD chronic kidney disease; MET, metabolic equivalent for task.

**Table 2 Factors associated with serum uric acid among Chinese adults**

|                                                             | Univariable         |                | Multivariable       |                         |
|-------------------------------------------------------------|---------------------|----------------|---------------------|-------------------------|
|                                                             | $\beta$ coefficient | <i>P</i> value | $\beta$ coefficient | Adjusted <i>P</i> value |
| <b>Age (every 10 years)</b>                                 | 0.019               | <0.001         | -0.028              | <0.001                  |
| <b>Gender (male vs. female)</b>                             | 0.287               | <0.001         | 0.290               | <0.001                  |
| <b>Hypertension (yes vs. no)</b>                            | 0.110               | <0.001         | 0.047               | <0.001                  |
| <b>DM (yes vs. no)</b>                                      | 0.124               | <0.001         | 0.067               | <0.001                  |
| <b>High LDL-c (yes vs. no)</b>                              | 0.031               | <0.001         | 0.004               | 0.743                   |
| <b>Obesity (yes vs. no)</b>                                 | 0.133               | <0.001         | 0.089               | <0.001                  |
| <b>CKD (yes vs. no)</b>                                     | 0.195               | <0.001         | 0.198               | <0.001                  |
| <b>Smoking (yes vs. no)</b>                                 | -0.018              | 0.307          | -                   | -                       |
| <b>Drinking (yes vs. no)</b>                                | 0.063               | <0.001         | 0.037               | 0.001                   |
| <b>Physical activity (every 10 METs)</b>                    | <0.001              | 0.700          | -                   | -                       |
| <b>Community-level urbanization index (every 10 points)</b> | 0.016               | <0.001         | 0.016               | <0.001                  |

The  $\beta$  coefficients and *P* values are from univariable and multivariable linear regression models of natural log-transformed uric acid as the dependent variable. The multivariable model included all covariates. DM, diabetes mellitus; LDL-c, low-density lipoprotein cholesterol; CKD, chronic kidney disease; MET, metabolic equivalent for task; –, without significance.

**Table 3 Association of urbanization and the risk of hyperuricemia among Chinese adults**

|                                        |      |                    |                    |
|----------------------------------------|------|--------------------|--------------------|
| <b>hyperuricemia (%)</b>               | 12.2 | 14.6               | 19.8               |
| <b>P<sup>1</sup></b>                   |      | 0.009              | <0.001             |
| <b>Odds ratio (95% CI)<sup>1</sup></b> | Ref. | 1.234(1.055-1.445) | 1.767(1.539-2.028) |
| <b>P<sup>2</sup></b>                   |      | 0.218              | <0.001             |
| <b>Odds ratio (95% CI)<sup>2</sup></b> | Ref. | 1.109(0.941-1.308) | 1.548(1.339-1.789) |
| <b>P<sup>3</sup></b>                   |      | 0.363              | 0.001              |
| <b>Odds ratio (95% CI)<sup>3</sup></b> | Ref. | 1.160(0.842-1.599) | 1.661(1.246-2.212) |

<sup>1</sup>Model 1 was only controlled by age, gender.<sup>2</sup>Model 2 was controlled by hypertension, diabetes mellitus and high low-density lipoprotein, obesity and chronic kidney disease

based on Model 1.<sup>3</sup>Model 3 was controlled by health-related behaviors (smoking, drinking, physical activity) based on Model 2.

## Figure Legend

**Figure1** Flowchart of the sample selecting methods at each step.

**Figure2** Adjusted odds ratios for hyperuricemia with high urbanicity according to baseline characteristics. Analyses were adjusted for age, gender, hypertension, diabetes mellitus, high LDL (high low-density lipoprotein), obesity, chronic kidney disease, smoking, drinking and physical activity, as appropriate. The square black boxes represent odds ratios, and the horizontal lines represent 95% confidence intervals. The triangle black boxes represent the overall odds ratios and 95% confidence intervals.

1  
2  
3  
4  
5  
6  
7  
8  
9  
10  
11  
12  
13  
14  
15  
16  
17  
18  
19  
20  
21  
22  
23  
24  
25  
26  
27  
28  
29  
30  
31  
32  
33  
34  
35  
36  
37  
38  
39  
40  
41  
42  
43  
44  
45  
46  
47  
48  
49  
50  
51  
52  
53  
54  
55  
56  
57  
58  
59  
60

For peer review only

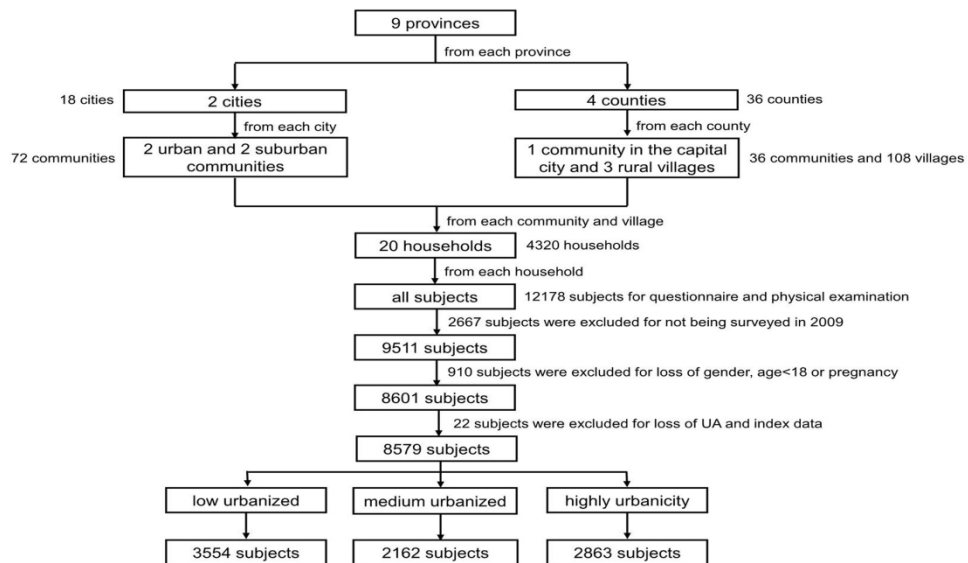

Flowchart of the sample selecting methods at each step

169x99mm (600 x 600 DPI)

1  
2  
3  
4  
5  
6  
7  
8  
9  
10  
11  
12  
13  
14  
15  
16  
17  
18  
19  
20  
21  
22  
23  
24  
25  
26  
27  
28  
29  
30  
31  
32  
33  
34  
35  
36  
37  
38  
39  
40  
41  
42  
43  
44  
45  
46  
47  
48  
49  
50  
51  
52  
53  
54  
55  
56  
57  
58  
59  
60

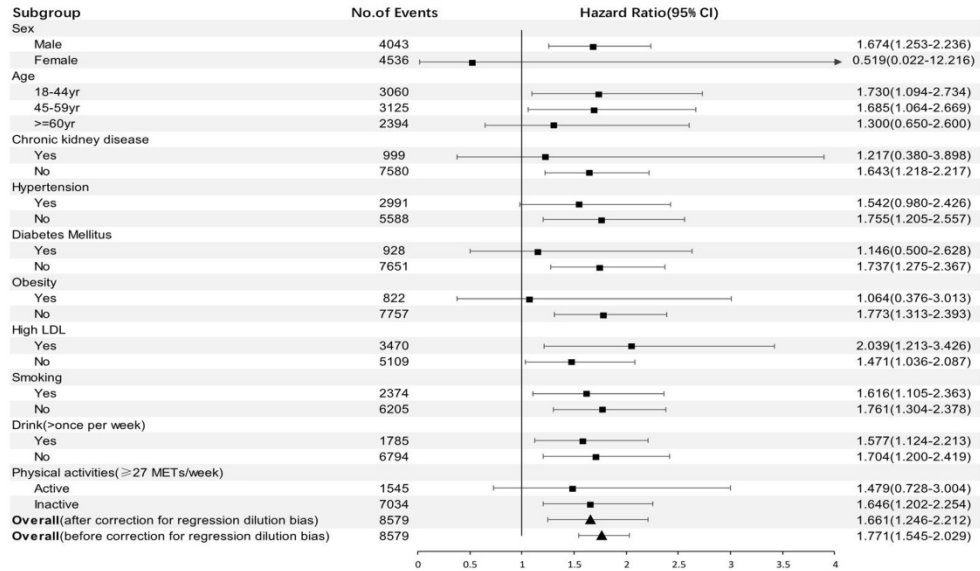

Adjusted odds ratios for hyperuricemia with high urbanicity according to baseline characteristics.

169x99mm (600 x 600 DPI)



STROBE Statement—Checklist of items that should be included in reports of *cross-sectional studies*

|                              | Item No | Recommendation                                                                                                                                                                                               | Page No |
|------------------------------|---------|--------------------------------------------------------------------------------------------------------------------------------------------------------------------------------------------------------------|---------|
| <b>Title and abstract</b>    | 1       | (a) Indicate the study's design with a commonly used term in the title or the abstract                                                                                                                       | 1       |
|                              |         | (b) Provide in the abstract an informative and balanced summary of what was done and what was found                                                                                                          | 2-3     |
| <b>Introduction</b>          |         |                                                                                                                                                                                                              |         |
| Background/rationale         | 2       | Explain the scientific background and rationale for the investigation being reported                                                                                                                         | 4       |
| Objectives                   | 3       | State specific objectives, including any prespecified hypotheses                                                                                                                                             | 5       |
| <b>Methods</b>               |         |                                                                                                                                                                                                              |         |
| Study design                 | 4       | Present key elements of study design early in the paper                                                                                                                                                      | 6-8     |
| Setting                      | 5       | Describe the setting, locations, and relevant dates, including periods of recruitment, exposure, follow-up, and data collection                                                                              | 5       |
| Participants                 | 6       | (a) Give the eligibility criteria, and the sources and methods of selection of participants                                                                                                                  | 5       |
| Variables                    | 7       | Clearly define all outcomes, exposures, predictors, potential confounders, and effect modifiers. Give diagnostic criteria, if applicable                                                                     | 6-8     |
| Data sources/<br>measurement | 8*      | For each variable of interest, give sources of data and details of methods of assessment (measurement). Describe comparability of assessment methods if there is more than one group                         | 6-8     |
| Bias                         | 9       | Describe any efforts to address potential sources of bias                                                                                                                                                    | 8       |
| Study size                   | 10      | Explain how the study size was arrived at                                                                                                                                                                    | 5       |
| Quantitative variables       | 11      | Explain how quantitative variables were handled in the analyses. If applicable, describe which groupings were chosen and why                                                                                 | 6-8     |
| Statistical methods          | 12      | (a) Describe all statistical methods, including those used to control for confounding                                                                                                                        | 9-10    |
|                              |         | (b) Describe any methods used to examine subgroups and interactions                                                                                                                                          | 10      |
|                              |         | (c) Explain how missing data were addressed                                                                                                                                                                  | 10      |
|                              |         | (d) If applicable, describe analytical methods taking account of sampling strategy                                                                                                                           | 10      |
|                              |         | (e) Describe any sensitivity analyses                                                                                                                                                                        | 10      |
| <b>Results</b>               |         |                                                                                                                                                                                                              |         |
| Participants                 | 13*     | (a) Report numbers of individuals at each stage of study—eg numbers potentially eligible, examined for eligibility, confirmed eligible, included in the study, completing follow-up, and analysed            | 11      |
|                              |         | (b) Give reasons for non-participation at each stage                                                                                                                                                         | 6       |
|                              |         | (c) Consider use of a flow diagram                                                                                                                                                                           | 6       |
| Descriptive data             | 14*     | (a) Give characteristics of study participants (eg demographic, clinical, social) and information on exposures and potential confounders                                                                     | 11      |
|                              |         | (b) Indicate number of participants with missing data for each variable of interest                                                                                                                          | 6       |
| Outcome data                 | 15*     | Report numbers of outcome events or summary measures                                                                                                                                                         | 11      |
| Main results                 | 16      | (a) Give unadjusted estimates and, if applicable, confounder-adjusted estimates and their precision (eg, 95% confidence interval). Make clear which confounders were adjusted for and why they were included | 11-12   |

|                          |    |                                                                                                                                                                            |       |
|--------------------------|----|----------------------------------------------------------------------------------------------------------------------------------------------------------------------------|-------|
|                          |    | (b) Report category boundaries when continuous variables were categorized                                                                                                  | 11    |
|                          |    | (c) If relevant, consider translating estimates of relative risk into absolute risk for a meaningful time period                                                           | 12    |
| Other analyses           | 17 | Report other analyses done—eg analyses of subgroups and interactions, and sensitivity analyses                                                                             | 12    |
| <b>Discussion</b>        |    |                                                                                                                                                                            |       |
| Key results              | 18 | Summarise key results with reference to study objectives                                                                                                                   | 13    |
| Limitations              | 19 | Discuss limitations of the study, taking into account sources of potential bias or imprecision. Discuss both direction and magnitude of any potential bias                 | 15    |
| Interpretation           | 20 | Give a cautious overall interpretation of results considering objectives, limitations, multiplicity of analyses, results from similar studies, and other relevant evidence | 14-15 |
| Generalisability         | 21 | Discuss the generalisability (external validity) of the study results                                                                                                      | 16    |
| <b>Other information</b> |    |                                                                                                                                                                            |       |
| Funding                  | 22 | Give the source of funding and the role of the funders for the present study and, if applicable, for the original study on which the present article is based              | 17-18 |

\*Give information separately for exposed and unexposed groups.

**Note:** An Explanation and Elaboration article discusses each checklist item and gives methodological background and published examples of transparent reporting. The STROBE checklist is best used in conjunction with this article (freely available on the Web sites of PLoS Medicine at <http://www.plosmedicine.org/>, Annals of Internal Medicine at <http://www.annals.org/>, and Epidemiology at <http://www.epidem.com/>). Information on the STROBE Initiative is available at [www.strobe-statement.org](http://www.strobe-statement.org).

# BMJ Open

## Association between urbanization and the risk of hyperuricemia among Chinese adults: a cross-sectional study from the China Health and Nutrition Survey (CHNS)

|                                 |                                                                                                                                                                                                                                                                                                                                                                                                                                                                                                                                                                                                                                                                    |
|---------------------------------|--------------------------------------------------------------------------------------------------------------------------------------------------------------------------------------------------------------------------------------------------------------------------------------------------------------------------------------------------------------------------------------------------------------------------------------------------------------------------------------------------------------------------------------------------------------------------------------------------------------------------------------------------------------------|
| Journal:                        | <i>BMJ Open</i>                                                                                                                                                                                                                                                                                                                                                                                                                                                                                                                                                                                                                                                    |
| Manuscript ID                   | bmjopen-2020-044905.R1                                                                                                                                                                                                                                                                                                                                                                                                                                                                                                                                                                                                                                             |
| Article Type:                   | Original research                                                                                                                                                                                                                                                                                                                                                                                                                                                                                                                                                                                                                                                  |
| Date Submitted by the Author:   | 04-Dec-2020                                                                                                                                                                                                                                                                                                                                                                                                                                                                                                                                                                                                                                                        |
| Complete List of Authors:       | Yu, Xixi; Zhongshan Hospital Fudan University, Zhu, Cheng; Zhongshan Hospital Fudan University Zhang, Han; Zhongshan Hospital Fudan University, Nephrology Shen, Ziyang; Zhongshan Hospital Fudan University, Nephrology Chen, Jing; Zhongshan Hospital Fudan University, Nephrology Gu, Yulu; Zhongshan Hospital Fudan University, Nephrology Lv, Shiqi; Zhongshan Hospital Fudan University, Nephrology Zhang, Di; Zhongshan Hospital Fudan University, Nephrology Wang, Yulin; Zhongshan Hospital Fudan University, Nephrology Zhang, Xiaoyan; Zhongshan Hospital Fudan University, Nephrology Ding, Xiaoqiang; Zhongshan Hospital Fudan University, Nephrology |
| <b>Primary Subject Heading</b>: | Public health                                                                                                                                                                                                                                                                                                                                                                                                                                                                                                                                                                                                                                                      |
| Secondary Subject Heading:      | Epidemiology                                                                                                                                                                                                                                                                                                                                                                                                                                                                                                                                                                                                                                                       |
| Keywords:                       | PUBLIC HEALTH, EPIDEMIOLOGY, RHEUMATOLOGY                                                                                                                                                                                                                                                                                                                                                                                                                                                                                                                                                                                                                          |
|                                 |                                                                                                                                                                                                                                                                                                                                                                                                                                                                                                                                                                                                                                                                    |

SCHOLARONE™  
Manuscripts



I, the Submitting Author has the right to grant and does grant on behalf of all authors of the Work (as defined in the below author licence), an exclusive licence and/or a non-exclusive licence for contributions from authors who are: i) UK Crown employees; ii) where BMJ has agreed a CC-BY licence shall apply, and/or iii) in accordance with the terms applicable for US Federal Government officers or employees acting as part of their official duties; on a worldwide, perpetual, irrevocable, royalty-free basis to BMJ Publishing Group Ltd ("BMJ") its licensees and where the relevant Journal is co-owned by BMJ to the co-owners of the Journal, to publish the Work in this journal and any other BMJ products and to exploit all rights, as set out in our [licence](#).

The Submitting Author accepts and understands that any supply made under these terms is made by BMJ to the Submitting Author unless you are acting as an employee on behalf of your employer or a postgraduate student of an affiliated institution which is paying any applicable article publishing charge ("APC") for Open Access articles. Where the Submitting Author wishes to make the Work available on an Open Access basis (and intends to pay the relevant APC), the terms of reuse of such Open Access shall be governed by a Creative Commons licence – details of these licences and which [Creative Commons](#) licence will apply to this Work are set out in our licence referred to above.

Other than as permitted in any relevant BMJ Author's Self Archiving Policies, I confirm this Work has not been accepted for publication elsewhere, is not being considered for publication elsewhere and does not duplicate material already published. I confirm all authors consent to publication of this Work and authorise the granting of this licence.

1  
2  
3  
4 **Association between urbanization and the risk of hyperuricemia among**  
5  
6 **Chinese adults: a cross-sectional study from the China Health and**  
7  
8 **Nutrition Survey (CHNS)**  
9

10  
11 Xixi Yu<sup>1,2,4#</sup>, Cheng Zhu<sup>1#</sup>, Han Zhang<sup>1,2,4</sup>, Ziyang Shen<sup>1,2,4</sup>, Jing Chen<sup>1,2,3</sup>, Yulu  
12  
13 Gu<sup>1,2,3</sup>, Shiqi Lv<sup>1,2,4</sup>, Di Zhang<sup>1,2,3</sup>, Yulin Wang<sup>1,2,3</sup>, Xiaoqiang Ding<sup>1,2,3,4\*</sup>,  
14  
15  
16 Xiaoyan Zhang<sup>1,2,3,4\*</sup>  
17

18  
19 <sup>1</sup> Department of Nephrology, Zhongshan Hospital, Fudan University, Shanghai,  
20  
21  
22 China.  
23

24  
25 <sup>2</sup> Shanghai Medical Center of Kidney Disease, Shanghai, China.  
26

27  
28 <sup>3</sup> Shanghai Key Laboratory of Kidney and Blood Purification, Shanghai, China.  
29

30  
31 <sup>4</sup> Shanghai Institute of Kidney and Dialysis, Shanghai, China.  
32

33  
34 # These authors contributed equally to this work

35  
36 **Key words:** urbanization, hyperuricemia, the China Health and Nutrition  
37  
38 Survey  
39

40  
41 **Corresponding author:**  
42

43  
44 \*Xiaoyan Zhang, Kidney and Dialysis Institute of Shanghai, No. 136 Medical  
45  
46 College Road, Shanghai 200032, China. E-mail: ZS\_XYZhang@163.com; Tel.

47  
48 / fax: +86-21-64038472  
49

50  
51 \*Xiaoqiang Ding, Department of Nephrology, Zhongshan Hospital, Fudan  
52  
53 University, No. 180 Fenglin Road, Shanghai 200032, China. E-mail:

54  
55 ding.xiaoqiang2015@hotmail.com; Tel. / fax: +86-21-64038472  
56  
57

58  
59 **Running title:** urbanization and hyperuricemia  
60

1  
2  
3  
4 **Word counts:2716**

5  
6 **Abstract:240**

7  
8  
9 **number of references:52**

10  
11 **number of figures and tables:5**

12  
13  
14  
15  
16  
17 No additional data available.

18  
19  
20  
21  
22 **Abstract**

23  
24 **Objectives** To explore the association between urbanicity and hyperuricemia  
25 (HUA) and whether urbanicity is an independent risk factor of HUA in Chinese  
26 adults.  
27  
28  
29

30  
31  
32 **Design** Data analysis from a cross-sectional survey.

33  
34  
35 **Setting and participants** 8579 subjects aged 18 years or older were enrolled  
36 in the study from the 2009 wave of the China Health and Nutrition Survey to  
37 analyze the association between urbanicity and hyperuricemia. According to  
38 urbanization index, we divided them into three categories (low, medium, and  
39 highly urbanized groups).  
40  
41  
42  
43  
44  
45  
46

47  
48 **Main outcome measures** HUA was defined as serum uric acid  $\geq 7$  mg/dL in  
49 men and  $\geq 6$  mg/dL in women.  
50  
51

52  
53 **Results** The prevalence of HUA in low, medium, and highly urbanized groups  
54 were 12.2%, 14.6% and 19.8%, respectively. The independent factors  
55 influencing serum uric acid included age, gender, hypertension, diabetes,  
56  
57  
58  
59  
60

1  
2  
3  
4 chronic kidney disease, drinking, obesity and community-level urbanization  
5  
6 index(  $\beta = 0.016$ ,  $p < 0.001$ ). The risk of HUA in highly urbanized group was  
7  
8 significantly higher than that of the low urbanized group (OR 1.771, 95%CI  
9  
10 1.545-2.029,  $P < 0.001$ ), even after adjusting for other covariates (OR 1.661,  
11  
12 95%CI 1.246-2.212,  $P = 0.001$ ). In subgroup analysis, we found that age, gender,  
13  
14 comorbidity (such as hypertension, diabetes, obesity, and chronic kidney  
15  
16 disease) and physical activities could affect the association between  
17  
18 urbanization and the risk of HUA.  
19  
20  
21  
22  
23  
24

25 **Conclusions** Our findings suggest that living in highly urbanized area is linked  
26  
27 with higher risk of hyperuricemia independently of cardiometabolic and health-  
28  
29 related behavioral risk factors, which have been shown to increase along with  
30  
31 urbanization.  
32  
33  
34  
35  
36  
37

### 38 **Strengths and limitations of this study**

- 39 ● The present study used the 2009 wave of the China Health and Nutrition  
40  
41 Survey represented 47% of China's population.  
42  
43
- 44 ● Regression models were used to explore the associations between  
45  
46 urbanization and the risk of hyperuricemia in Chinese adults.  
47  
48
- 49 ● The association in female group could be unavoidably affected because a  
50  
51 fair amount of smoking data was missing.  
52  
53
- 54 ● Even with self-reported history, physical and laboratory examination, the  
55  
56 real prevalence of hypertension, diabetes mellitus might be underestimated.  
57  
58  
59  
60

## Introduction

In recent decades, with the changes in diet and lifestyle as the economy develops, the prevalence of hyperuricemia(HUA) increases rapidly[1]. In 2014, the prevalence of hyperuricemia in Chinese adults was 13.3% [2]. Hyperuricemia is not only an independent risk factor for new-onset chronic kidney disease (CKD)[3], but is also for CKD progression[4, 5]. Males and females with hyperuricemia have an increase in the risk of end-stage renal disease for 4 and 9 times, respectively[6]. Furthermore, hyperuricemia was reported to increase the risk of diabetes mellitus [7], hypertension[8], dyslipidemia[9], and cardiovascular events, especially sudden cardiac death[10, 11].

Urbanicity was confirmed to have an influence on health through nutrition and lifestyle choices, pollution, occupational and traffic hazards, sanitary condition such as health-care access and vaccination coverage[12, 13]. Several studies have found that pollution[14], drinking[15], smoking[16], reduced physical activity[17, 18], fructose intake[19], were all associated with HUA. Furthermore, some studies have found that renal function was related to urbanicity [20, 21].The cause of HUA includes increased urate generation, decreased urate excretion and both of the two. Two-thirds of the urate is excreted through the kidney into urine [22]. Reduced renal function can significantly increase the risk of hyperuricemia[23, 24]. Then, whether urbanicity is an independent risk factor



1  
2  
3  
4 of HUA or not? Few studies had investigated the relationship between  
5  
6 urbanicity and HUA.  
7

8  
9 To explore the association between urbanicity and hyperuricemia, we used data  
10  
11 from the China Health and Nutrition Survey (CHNS) and designed a multilevel  
12  
13 model to explore whether urbanicity is an independent risk factor of  
14  
15 hyperuricemia.  
16  
17

## 18 19 20 21 22 **Materials and Methods**

### 23 24 25 **Sampling and Participants**

26  
27 Sampling in the present study came from the survey of China Health and  
28  
29 Nutrition Survey (CHNS) in 2009. The CHNS is a longitudinal study of nine  
30  
31 Chinese provinces (Guizhou, Guangxi, Heilongjiang, Henan, Hubei, Hunan,  
32  
33 Liaoning, Jiangsu and Shandong). Nine surveys have been conducted since  
34  
35 1989[25]. By 2011, the provinces included in the CHNS sample represented 47%  
36  
37 of China's population (according to the census of 2010). The CHNS was  
38  
39 designed to provide representation of urban, suburban and rural areas, varying  
40  
41 significantly in economic development, public resources, geography and health  
42  
43 indicators, and to focus on health during urbanization and economic change[26].  
44  
45 We selected a stratified probability sample from the nine provinces using a  
46  
47 multistage, random-cluster design. Using this sampling strategy, from each  
48  
49 province we selected two cities (one large city, usually the provincial capital,  
50  
51 and one small city, usually a lower income city) and four counties (stratified by  
52  
53  
54  
55  
56  
57  
58  
59  
60

1  
2  
3  
4 income: one high, one low, and two middle-income counties). Within cities, we  
5  
6 randomly selected two urban and two suburban communities; within counties,  
7  
8 we randomly selected one community in the capital city and three rural villages.  
9  
10  
11 In each community, we selected 20 households in random and all household  
12  
13 members were interviewed. The 2009 wave consisted of 216 communities and  
14  
15 included 36 urban neighborhoods, 36 suburban neighborhoods, 36 towns and  
16  
17 108 villages. Current study population included 8579 participants aged 18 years  
18  
19 or older and the selection procedures are depicted in Figure 1.  
20  
21  
22  
23  
24  
25  
26

### 27 **Urbanicity scale**

28  
29  
30 Urbanicity was defined using a 12-component index capturing community-level  
31  
32 physical, social, cultural and economic environments designed and validated  
33  
34 for the CHNS[26]. The following 12 components were included in the  
35  
36 development of the urbanization index: 1. population density; 2. types of  
37  
38 economic activity; 3. traditional market; 4. modern markets; 5. transportation and  
39  
40 infrastructure; 6. sanitation; 7. communications (e.g., TV, mobile, post, and  
41  
42 cinema); 8. housing (e.g., electricity, indoor tap water, and flush toilet); 9.  
43  
44 education; 10. diversity (i.e., variation in community education level and variation  
45  
46 in community income level); 11. health infrastructure; and 12. social services.  
47  
48  
49 This scale represents abroad-based measure of the elements of modernization  
50  
51 that have potential health effects. Heterogeneity was captured by components  
52  
53 in the presence/absence or number of facilities within the community, access  
54  
55  
56  
57  
58  
59  
60

1  
2  
3  
4 to media or infrastructure, facility characteristics and the average proportion of  
5  
6 individuals and households having a specific education or income level. From  
7  
8 the CHNS household responses, we obtained the variables measuring  
9  
10 proportion of households. Furthermore, from the CHNS community-level survey  
11  
12 offered to community officials, we derived the remaining variables as described  
13  
14 by Jones-Smith and Popkin, scoring distributions were variable across  
15  
16 components, so they set the median score in a middle year as half the total  
17  
18 points and each of the components was scaled to 0~10 [27, 28]. Each  
19  
20 component was then weighted equally in the overall index and added together  
21  
22 for an overall maximum possible score of 120. This scale has been validated  
23  
24 for content validity, reliability ( $\alpha=0.85\sim0.89$  across all study years), and stability  
25  
26 across study years( $r=0.90\sim0.94$ ). Since the community-level urbanization  
27  
28 indexes in the population we studied ranged from 30.4 to 106.6, all participants  
29  
30 were divided into low ( $<55.01$ ), medium ( $\geq 55.01$  and  $<82.33$ ) and highly  
31  
32 ( $\geq 82.33$ ) urbanized groups by their community-level urbanization index tertiles  
33  
34 accordingly.  
35  
36  
37  
38  
39  
40  
41  
42  
43  
44  
45  
46  
47

### 48 **Definition of hyperuricemia**

49  
50 After at least 12 hours of overnight fasting, blood sample was collected by  
51  
52 venipuncture in the morning. 4 ml of the blood sample was collected into a tube  
53  
54 with separating gel, and was centrifuged 30 min after blood collection, at  $3000\times$   
55  
56 g for 15 min; the serum sample obtained from the centrifugation was frozen and  
57  
58  
59  
60

1  
2  
3  
4 stored at  $-86^{\circ}\text{C}$  for later laboratory analysis. Another blood sample (500 $\mu\text{L}$ ) was  
5  
6 collected into a tube with EDTA for routine blood examination. All samples were  
7  
8 verified and analyzed in a national central lab in Beijing (medical laboratory  
9  
10 accreditation certificate ISO 15189:2007) according to strict quality control  
11  
12 standard[29]. Serum uric acid (SUA) concentrations were measured with the  
13  
14 use of an enzymatic colorimetric method on a Hitachi 7600 automated analyzer  
15  
16 (Hitachi Inc., Tokyo, Japan) by determiner reagents (Randox Laboratories Ltd.,  
17  
18 Crumlin, UK). HUA was defined as SUA concentrations  $\geq 7$  mg/dL in men and  
19  
20  $\geq 6$  mg/dL in women[1, 29-32].  
21  
22  
23  
24  
25  
26  
27  
28  
29

### 30 **Assessment of covariates**

31  
32 Self-reported medical history including hypertension, diabetes mellitus or high  
33  
34 blood sugar, and lifestyle information such as smoking, drinking was collected  
35  
36 by trained interviewers. Hypertension was defined as either systolic pressure  $\geq$   
37  
38 140 mmHg, diastolic pressure  $\geq 90$  mmHg or self-reported diagnosis of  
39  
40 hypertension[33]. Diabetes mellitus (DM) was defined as either fasting blood  
41  
42 glucose  $\geq 126$  mg/dL (7.0 mmol/L) or glycosylated hemoglobin  $\geq 6.5\%$  or self-  
43  
44 reported diagnosis of DM[34]. High level of low-density lipoprotein cholesterol  
45  
46 (LDL-c) was defined as  $\geq 3.12$  mmol/L[35]. To accurately estimate the kidney  
47  
48 function, we referred to CKD-EPI equation to calculate the estimated glomerular  
49  
50 filtration rate (eGFR):  $\text{eGFR} = 141 \times \min(\text{SCr}/\kappa, 1)^{\alpha} \times \max(\text{SCr}/\kappa, 1)^{-1.209} \times 0.993$   
51  
52  $\text{Age} \times 1.021$  [if female]  $\times 1.159$  [if black], where SCr is serum creatinine,  $\kappa$  is 0.7  
53  
54  
55  
56  
57  
58  
59  
60

1  
2  
3  
4 for females and 0.9 for males,  $\alpha$  is -0.329 for females and -0.411 for males, min  
5  
6 indicates the minimum of  $SCr/\kappa$  or 1, and max indicates the maximum of  $SCr/\kappa$   
7  
8 or 1[36]. Chronic kidney disease(CKD) was defined as  $eGFR < 60$  ml/min/1.73  
9  
10  $m^2$  according to Kidney Disease: Improving Global Outcomes (KDIGO) 2012  
11  
12 Clinical Practice Guideline for the Evaluation and Management of Chronic  
13  
14 Kidney Disease[36]. From physical examination, we obtained the participants'  
15  
16 body weight and height. Body mass index (BMI) was calculated as weight(kg)  
17  
18 divided by height squared, and was classified into normal or overweight (BMI<  
19  
20 28.0kg/m<sup>2</sup>), and obese (BMI  $\geq$  28.0 kg/m<sup>2</sup>)[37].

21  
22 Physical activity included domestic activity(such as washing clothes, buying  
23  
24 food for the family), occupation activity, transportation activity (such as walking  
25  
26 to work or going to work by car), leisure activity (such as Kung fu, swimming,  
27  
28 playing football)[38, 39], which was estimated by metabolic equivalent for task  
29  
30 (MET). MET is a unit that estimates the amount of energy used by the body  
31  
32 during physical activity, as compared to resting metabolism. The unit is  
33  
34 standardized so it can apply to people of varying body weight and compare  
35  
36 different activities[40]. Active or inactive group was defined as  $\geq$ / $<$  27  
37  
38 METs/week according to the physical activity level[29].The data of alcohol  
39  
40 consumption and smoking situation of the participants also could be attained  
41  
42 from CHNS and was classified into "yes" ( $\geq$  once per week) and "no" ( $<$ once  
43  
44 per week) in our analysis.  
45  
46  
47  
48  
49  
50  
51  
52  
53  
54  
55  
56  
57  
58  
59  
60

## Statistical analysis

Continuous variables were presented as means  $\pm$  standard deviation (SD), while frequencies and percentages were used as categorical variables. The one-way ANOVA test (for continuous variables) and  $\chi^2$  tests (for categorical variables) were used to compare the difference of HUA, age, gender, cardiometabolic risk factors (hypertension, diabetes mellitus, high level of LDL-c, obesity, CKD) and health-related behaviors (drinking, smoking, physical activity) among groups, respectively. And then the associations of uric acid with variables were tested using Spearman correlation coefficients in unadjusted and multivariable-adjusted linear regression models.

The method of maximum likelihood by the binary logistics regression model, was used to analyze the relationship between the risk of HUA in adulthood and community-level urbanization exposure. In the multivariable logistic regression model, we adjusted for age, gender, CKD, health-related behaviors and cardiometabolic risk factors. Model 1 was only controlled by age and gender, Model 2 was controlled for factors from model 1 plus cardiometabolic risk factors (obesity, hypertension, DM, high LDL, obesity and CKD). For Model 3, health-related behaviors (smoking, drinking, physical activity) were added for adjustment. All statistical analysis was conducted using the Statistical Package for the Social Sciences 13.0 (SPSS Inc., Chicago, IL, USA). The data was demonstrated as odds ratio (OR) and 95% confidence interval (CI). A two-side p value  $<0.05$  was considered significant.

## Results

### Characteristics of participants by tertiles of community-level urbanization index

A total of 8579 participants were enrolled into the current study. Basic characteristics of the participants are presented in Table 1. The prevalence of HUA rose with the urbanization scale (from 12.2% to 14.6% to 19.8%,  $p < 0.001$ ), the same as the trend of mean SUA levels (from 5.02 to 5.16 to 5.42,  $p < 0.001$ ). With the increasing of the urbanization index, renal function declined dramatically (eGFR reduced from 81.98 to 78.71 to 76.57,  $p < 0.001$ ). In terms of cardiometabolic risk factors, subjects who lived in more urbanized communities were prone to hypertension, diabetes mellitus, high LDL-c and obesity. For the perspective of health-related behaviors, those subjects from higher urbanized areas tended to smoke less, drink less and be less physically active compared with lower urbanized areas.

### Risk factors associated with serum uric acid among Chinese adults

Table 2 shows the results of the univariable and multivariable linear regression analyses between serum uric acid and age, gender, cardiometabolic risk factors and health-related behaviors. The independent factors influencing serum uric acid included age, gender, hypertension, DM, obesity, CKD, drinking, and community-level urbanization index. Males, drinking individuals, individuals

1  
2  
3  
4 with cardiometabolic risk factors (such as hypertension, diabetes, obesity and  
5  
6 CKD), and individuals who lived in a community with higher urbanization index  
7  
8  
9 tended to have higher serum uric acid.  
10

### 11 12 13 14 **Association of urbanization and the risk of hyperuricemia among Chinese** 15 16 17 **adults**

18  
19 The association of urbanization with HUA in Chinese adults is demonstrated in  
20  
21 Table 3. Compared with low urbanized group, the prevalence of HUA in medium  
22  
23 and highly urbanized groups showed significant difference in univariate  
24  
25 analysis, as shown in Table 1. We found even after adjusted by age, gender,  
26  
27 cardiometabolic risk factors and health-related behaviors, the highly urbanized  
28  
29 group still had higher risk of HUA compared with low urbanized group (OR  
30  
31 1.661, 95%CI 1.246-2.212, P=0.001). Furthermore, by subgroup analysis of the  
32  
33 low and highly urbanized, age, gender, comorbidities (such as hypertension,  
34  
35 diabetes, obesity and CKD) and physical activity were suggested to affect the  
36  
37 association between urbanization and the risk of HUA (Figure 2). Young and  
38  
39 middle-aged males living in the community with higher community-level  
40  
41 urbanization index were prone to higher risk of HUA. Such association also  
42  
43 existed in individuals without hypertension, diabetes, obesity or CKD and  
44  
45 individuals with less physical activity.  
46  
47  
48  
49  
50  
51  
52  
53  
54  
55  
56  
57

### 58 **Discussion**

59  
60



1  
2  
3  
4 In the current study, we found that individuals living in higher urbanized areas  
5  
6 were prone to higher risk of HUA. The association between urbanicity and HUA  
7  
8 still remained after adjusted age, gender, cardiometabolic and health-related  
9  
10 behavioral risk factors.  
11  
12

13  
14 What cause large regional differences in PM2.5 pollutions in China? Several  
15  
16 potential mechanisms could explain the associations between high urbanicity  
17  
18 and HUA. There is high pollution in highly urbanized area[41-43]. Previous  
19  
20 studies had revealed that air pollution in China is mainly caused by population  
21  
22 aggregation, urbanization, industrial discharges, outside investment, vehicle  
23  
24 exhausts, coal consumption, technological development and straw burning[44,  
25  
26 45]. And air pollution was reported to associate with lower eGFR and increased  
27  
28 prevalence of CKD, thus increasing the risk of hyperuricemia[46]. Furthermore,  
29  
30 previous studies have confirmed that the air pollution contained toxic organic  
31  
32 agents including polychlorinated biphenyls (PCBs), polycyclic aromatic  
33  
34 hydrocarbons (PAHs), perfluorinated alkyl substances (PFASa), and dioxins,  
35  
36 which could increase serum uric acid concentrations and the incidence of  
37  
38 HUA[47]. Exposure to greater concentrations of long-term ambient air  
39  
40 pollutants has been confirmed to be associated with a higher incidence of  
41  
42 hyperuricemia[14].  
43  
44  
45  
46  
47  
48  
49  
50  
51

52  
53 High urbanicity is accompanied with less physical activity. As found in our study,  
54  
55 the physical activity declined with the increase of urbanicity. In high urbanized  
56  
57 areas, occupational physical activity is less common, as well as the  
58  
59  
60

1  
2  
3  
4 transportation and domestic activity, as the popularization of motorized  
5  
6 transport and labor-saving household appliances[48]. Physical exercise is  
7  
8 closely interacted with serum uric acid. It was reported that SUA of the  
9  
10 professional endurance athletes were significantly lower than non-athletes[49].  
11  
12 After aerobic exercise, serum uric acid increased immediately and then  
13  
14 decreased to a level even lower than pre-exercise level[50], because energy-  
15  
16 rich purine phosphates are transiently accumulated and catabolized, following  
17  
18 by the lasting-long depletion. In our study, we also confirmed that, with  
19  
20 inadequate physical activities, individuals living in high urbanized communities  
21  
22 have higher risk of HUA.  
23  
24  
25  
26  
27  
28

29  
30 High urbanicity means worse kidney function. A previous study including a large  
31  
32 amount of population revealed that the higher risk of CKD in the higher  
33  
34 urbanicity community[51]. And as we found in Table 1, the highly urbanized  
35  
36 group had the highest prevalence of CKD. Kidney is the most important organ  
37  
38 to excrete uric acid and kidney function is closely related to SUA, which was  
39  
40 consistent with Table 2. The serum uric acid level of patients with CKD was  
41  
42 higher than those without CKD.  
43  
44  
45  
46  
47

48 Urbanization has close association with other non-communicable diseases,  
49  
50 such as diabetes, hypertension, high LDL-c, cardiovascular disease, cancer,  
51  
52 and neuropsychiatric disorders with the changes in patterns of human activity,  
53  
54 diet, and social structures in China[13]. These diseases can also increase the  
55  
56 risk of HUA in some specific ways[1, 7, 11, 52].  
57  
58  
59  
60

1  
2  
3  
4 In addition, we also found that age, gender, comorbidity (such as hypertension,  
5 diabetes, obesity and CKD) and physical activity could affect the association  
6 between urbanization and the risk of HUA. Young and middle-aged men living  
7 in the community with high community-level urbanization index are prone to  
8 higher risk of HUA. Such association also exists in individuals without  
9 hypertension, diabetes, obesity and CKD and in individuals with less physical  
10 activity, suggesting that in high urbanized area, individuals without traditional  
11 HUA risk factors still have higher risk of HUA. The interaction between  
12 urbanicity and hypertension, diabetes, obesity and CKD might conceal the  
13 relationship between urbanicity and HUA in these subgroups.  
14  
15  
16  
17  
18  
19  
20  
21  
22  
23  
24  
25  
26  
27  
28  
29

30 The strengths of our study are: first, the data we analyzed in our survey was  
31 extracted from the CHNS including nine provinces which are widely  
32 representative of the entire Chinese mainland. Second, the innovative grouping  
33 and stratifying methods make it clarified to distinguish the exact stage in which  
34 urbanicity exerts influences on HUA.  
35  
36  
37  
38  
39  
40  
41  
42

43 Our study also has some limitations. First, elderly individuals in our study tend  
44 to have lower serum uric acid. Reduced kidney function, hypertension and  
45 diabetes could increase the risk of HUA, and are common in elderly individuals.  
46  
47  
48  
49  
50 However, elderly individuals usually diet less purine-rich food, pay more  
51 attention to health-related diets and behaviors than young individuals. Effective  
52 diet control can reduce serum uric acid by 60~70 $\mu$ mol/L, which can partly  
53 explain the relationship between age and serum uric acid. Second, the  
54  
55  
56  
57  
58  
59  
60

1  
2  
3  
4 association between urbanicity and HUA only exists in men after adjusting  
5  
6 cardiometabolic and health-related behavioral risk factors. This may be  
7  
8 explained by that females tend to smoke less, drink less and be more inactive  
9  
10 compared with males, thus their uric acid level is less influenced by urbanicity.  
11  
12 Third, the association in female group could be unavoidably affected because  
13  
14 a fair amount of smoking data was missing. Fourth, even with self-reported  
15  
16 history, physical and laboratory examination, the real prevalence of  
17  
18 hypertension, diabetes mellitus might be underestimated. Finally, the  
19  
20 population we analyzed was derived from China, and global data is needed to  
21  
22 generalize the result.  
23  
24  
25  
26  
27  
28

29  
30 In conclusion, living in high urbanized area is linked with higher risk of  
31  
32 hyperuricemia independently of health-related behavioral and cardiometabolic  
33  
34 risk factors, especially in individuals without traditional HUA risk factors, such  
35  
36 as hypertension, diabetes mellitus, obesity or CKD.  
37  
38  
39  
40  
41  
42

### 43 **Acknowledgements**

44  
45 We would like to acknowledge the team of the National Institute for Nutrition  
46  
47 and Health, Chinese Center for Disease Control and Prevention, the Carolina  
48  
49 Population Center, University of North Carolina at Chapel Hill, and the China–  
50  
51 Japan Friendship Hospital, Ministry of Health who conducted the China Health  
52  
53 and Nutrition Survey 2009. And we also acknowledge all the participants  
54  
55 included in this study.  
56  
57  
58  
59  
60

## Ethics

The CHNS was approved by the Institutional Review Board at the University of North Carolina at Chapel Hill, the China-Japan Friendship Hospital and the Chinese Center for Disease Control and Prevention's National Institute for Nutrition and Health. All subjects gave informed consent for participation. The access to the data with approved by the above Institutional Review Board. The analysis of the data presented in this paper was approved by the Ethics Committee of Zhongshan Hospital, Fudan University (B2018-166).

## Patient and Public Involvement statement

Patients and public had not been involved in the development of the research question or in the design of the study. Patients had received oral and written information about this research; however, they were not involved in the recruitment and conduct of the study. After signing informed consent, they were assessed for eligibility, and data collection began. Dissemination of the general results (no personal data) were approved only after the CHNS Review Board qualified the application.

## Contributors

Zhang Xiaoyan and Ding Xiaoqiang were co-investigators and supervisors of the study. Yu Xixi carried out the study design, the data analysis and paper

1  
2  
3  
4 writing. Zhu Cheng provided the original idea of the paper, the original writing  
5  
6 idea of the paper and played a vital role in revised submission. Zhang Han and  
7  
8 Chen Jing served as scientific advisors and supervised data analysis. Shen  
9  
10 Ziyan and Gu Yulu polished the article. Lv Shiqi, Zhang Di and Wang Yulin  
11  
12 collected the data. All authors were involved in writing the paper and had final  
13  
14 approval of the submitted and published versions.  
15  
16  
17  
18  
19  
20  
21

### 22 **Data sharing statement**

23  
24 The datasets analyzed in the current study are available online  
25  
26 (<https://www.cpc.unc.edu/projects/china>).  
27  
28  
29  
30  
31

32 **Competing Interests: None declared.**  
33  
34  
35  
36  
37

### 38 **Funding**

39  
40 This study was supported by research grants from the Ministry of Science and  
41  
42 Technology of People's Republic of China (2016YFC1305500), Shanghai  
43  
44 Municipal Health Commission (2017ZZ01015), and the China National Natural  
45  
46 Scientific Foundation (81700646 and 81970637). The funders had no roles in  
47  
48 study design, data collection and analysis, decision to publish, or preparation  
49  
50 of the manuscript.  
51  
52  
53  
54  
55  
56  
57  
58  
59  
60

## References

- 1 Zhu Y, Pandya BJ, Choi HK. Prevalence of gout and hyperuricemia in the US general population: The National Health and Nutrition Examination Survey 2007–2008. *Arthritis Rheum* 2011;**63**:3136-41.
- 2 Liu R, Han C, Wu D, *et al*. Prevalence of Hyperuricemia and Gout in Mainland China from 2000 to 2014: A Systematic Review and Meta-Analysis. *BioMed Research International*;2015:1-12.
- 3 Li L, Yang C, Zhao Y, *et al*. Is hyperuricemia an independent risk factor for new-onset chronic kidney disease?: a systematic review and meta-analysis based on observational cohort studies. *BMC Nephrol*;15.
- 4 Weiner DE, Tighiouart H, Elsayed EF, *et al*. Uric Acid and Incident Kidney Disease in the Community. *J Am Soc Nephrol*;19:1204-11.
- 5 Duk-Hee K. A role for uric acid in the progression of renal disease. *Journal of the American Society of Nephrology : JASN* 2002;**12**.
- 6 Kunitoshi I. Significance of hyperuricemia as a risk factor for developing ESRD in a screened cohort. *American journal of kidney diseases : the official journal of the National Kidney Foundation* 2004;**4**.
- 7 Sluijs I, Beulens JWJ, van der A DL, *et al*. Plasma Uric Acid Is Associated with Increased Risk of Type 2 Diabetes Independent of Diet and Metabolic Risk Factors. *The Journal of Nutrition* 2012;**143**:80-5.
- 8 Kansui Y, Matsumura K, Morinaga Y, *et al*. Impact of serum uric acid on incident hypertension in a worksite population of Japanese men. *J Hypertens*;36:1499-505.

- 1  
2  
3  
4 9 Peng T-C, Wang C-C, Kao T-W, *et al.* Relationship between hyperuricemia and lipid  
5  
6 profiles in US adults. *BioMed Research International* 2015;**2015**:127596-  
7  
8  
9 10 Kleber ME, Delgado G, Grammer TB, *et al.* Uric Acid and Cardiovascular Events: A  
10  
11 Mendelian Randomization Study. *J Am Soc Nephrol*;**26**:2831-8.  
12  
13  
14 11 Feig DI, Kang D-H, Johnson RJ. Uric Acid and Cardiovascular Risk. *N Engl J Med*  
15  
16 2008;**359**:1811-21.  
17  
18  
19 12 Vlahov D, Galea S. Urbanization, urbanicity, and health. *Journal of urban health : bulletin*  
20  
21 *of the New York Academy of Medicine* 2002;**79**:S1-S12.  
22  
23  
24 13 Gong P, Liang S, Carlton EJ, *et al.* Urbanisation and health in China. *The Lancet*  
25  
26 2012;**379**:843-52.  
27  
28  
29 14 Tang Y-X, Bloom MS, Qian Z, *et al.* Association between ambient air pollution and  
30  
31 hyperuricemia in traffic police officers in China: a cohort study. *Int J Environ Health Res* 2019:1-  
32  
33 9.  
34  
35  
36  
37 15 Nakamura K, Sakurai M, Miura K, *et al.* Alcohol intake and the risk of hyperuricaemia: A  
38  
39 6-year prospective study in Japanese men. *Nutrition, Metabolism and Cardiovascular Diseases*  
40  
41 2012;**22**:989-96.  
42  
43  
44  
45 16 Yang T, Zhang Y, Wei J, *et al.* Relationship between cigarette smoking and hyperuricemia  
46  
47 in middle-aged and elderly population: a cross-sectional study. *Rheumatol Int* 2016;**37**:131-6.  
48  
49  
50 17 Liu, Li, Zhang, *et al.* Relationship between lifestyle choices and hyperuricemia in Chinese  
51  
52 men;and women. *Clin Rheumatol* 2013;**32**:233-9.  
53  
54  
55  
56  
57  
58  
59  
60



- 1  
2  
3  
4 18 Veronese N, Stubbs B, Trevisan C, *et al.* Results of an Observational Cohort Study of  
5  
6 Hyperuricemia as a Predictor of Poor Physical Performance in the Elderly. *Arthritis Care Res*  
7  
8  
9  
10  
11  
12 19 Cicero AFG, Fogacci F, Desideri G, *et al.* Arterial Stiffness, Sugar-Sweetened Beverages  
13  
14 and Fruits Intake in a Rural Population Sample: Data from the Brisighella Heart Study. *Nutrients*  
15  
16  
17 2019;**11**.
- 18  
19  
20 20 Wang S, Chen R, Liu Q, *et al.* Prevalence, awareness and treatment of chronic kidney  
21  
22 disease among middle-aged and elderly: The China Health and Retirement Longitudinal Study.  
23  
24  
25  
26  
27 21 Kaze FF, Meto DT, Halle M-P, *et al.* Prevalence and determinants of chronic kidney  
28  
29 disease in rural and urban Cameroonians: a cross-sectional study. *BMC Nephrol* 2015;**16**:117.
- 30  
31  
32 22 Sorensen LB. Role of the intestinal tract in the elimination of uric acid.  
33  
34  
35 23 Krishnan E. Reduced glomerular function and prevalence of gout: NHANES 2009-10.  
36  
37  
38 24 Madero M, Sarnak MJ, Wang X, *et al.* Uric Acid and Long-term Outcomes in CKD. *Am J*  
39  
40  
41  
42  
43 25 Popkin BM, Du S, Zhai F, *et al.* Cohort Profile: The China Health and Nutrition Survey--  
44  
45 monitoring and understanding socio-economic and health change in China, 1989-2011. *Int J*  
46  
47  
48  
49  
50  
51 26 Jones-Smith JC, Popkin BM. Understanding community context and adult health changes  
52  
53 in China: Development of an urbanicity scale. *Soc Sci Med* 2010;**71**:1436-46.  
54  
55  
56 27 DeVellis R. *Scale Development: Theory and Applications* 1991.  
57  
58  
59  
60

- 1  
2  
3  
4 28 Dahly MDL, Adair LS. Quantifying the urban environment: a scale measure of urbanicity  
5  
6  
7 outperforms the urban-rural dichotomy. *other* 2007;**64**.
- 8  
9 29 Thompson AL, Houck KM, Adair L, *et al*. Multilevel examination of the association of  
10  
11 urbanization with inflammation in Chinese adults. *Health & Place*;28:177-86.
- 12  
13  
14 30 Becker MA, Schumacher HR, Wortmann RL, *et al*. Febuxostat Compared with Allopurinol  
15  
16 in Patients with Hyperuricemia and Gout. *N Engl J Med* 2005;**353**:2450-61.
- 17  
18  
19 31 Zhang W, Doherty M, Pascual E, *et al*. EULAR evidence based recommendations for gout.  
20  
21 Part I: Diagnosis. Report of a task force of the standing committee for international clinical  
22  
23 studies including therapeutics (ESCISIT). *Ann Rheum Dis* 2006;**65**:1301.
- 24  
25  
26  
27 32 Perez-Ruiz F, Lioté F. Lowering serum uric acid levels: What is the optimal target for  
28  
29 improving clinical outcomes in gout? *Arthritis Care Res (Hoboken)* 2007;**57**:1324-8.
- 30  
31  
32 33 Williams B, G M, W S, *et al*. [2018 ESC/ESH Guidelines for the management of arterial  
33  
34 hypertension]. *Eur Heart J* 2019;**77**:71.
- 35  
36  
37 34 5. Lifestyle Management: &lt;em>&gt;Standards of Medical Care in Diabetes—  
38  
39 2019&lt;/em>&gt;. *Diabetes Care* 2019;**42**:S46.
- 40  
41  
42  
43 35 Mach F, Baigent C, Catapano A, *et al*. 2019 ESC/EAS guidelines for the management of  
44  
45 dyslipidaemias: Lipid modification to reduce cardiovascular risk. *Atherosclerosis* 2019.
- 46  
47  
48 36 Andrassy KM. Comments on 'KDIGO 2012 Clinical Practice Guideline for the Evaluation  
49  
50 and Management of Chronic Kidney Disease'. *Kidney Int* 2013;**84**:622-3.
- 51  
52  
53 37 Zhou BF. Effect of Body Mass Index on All-cause Mortality and Incidence of  
54  
55 Cardiovascular Diseases—Report for Meta-Analysis of Prospective Studies on Optimal Cut-off  
56  
57 Points of Body Mass Index in Chinese Adults. *Biomed Environ Sci* 2002;**15**:245.
- 58  
59  
60

- 1  
2  
3  
4 38 Ainsworth BE, Haskell WL, Whitt MC, *et al.* Compendium of Physical Activities: an Update  
5  
6 of Activity Codes and MET Intensities. *Med Sci Sports Exerc* 2000;**32**:S498-504.  
7  
8  
9 39 Ng SW, Norton EC, Popkin BM. Why have physical activity levels declined among Chinese  
10  
11 adults? Findings from the 1991–2006 China health and nutrition surveys. *Soc Sci Med*  
12  
13 2009;**68**:1305-14.  
14  
15  
16 40 Sallis JF, Haskell WL, Wood PD, *et al.* Physical activity assessment methodology in the  
17  
18 Five-City Project. *Am J Epidemiol* 1985;**121**:91-106.  
19  
20  
21 41 Xu W, Sun J, Liu Y, *et al.* Spatiotemporal variation and socioeconomic drivers of air  
22  
23 pollution in China during 2005–2016. *J Environ Manage*; **245**:66-75.  
24  
25  
26 42 Zhang L, Liu L, Zhao Y, *et al.* Source attribution of particulate matter pollution over North  
27  
28 China with the adjoint method. *Environmental Research Letters* 2015;**10**:084011.  
29  
30  
31 43 Han L, Zhou W, Pickett STA, *et al.* An optimum city size? The scaling relationship for urban  
32  
33 population and fine particulate (PM 2.5 ) concentration. *Environmental Pollution*; **208**:96-101.  
34  
35  
36 44 Luo K, Li G, Fang C, *et al.* PM2.5 mitigation in China: Socioeconomic determinants of  
37  
38 concentrations and differential control policies. *J Environ Manage* 2018;**213**:47-55.  
39  
40  
41 45 Xu B, Lin B. What cause large regional differences in PM2.5 pollutions in China? Evidence  
42  
43 from quantile regression model. *Journal of Cleaner Production* 2018;**174**:447-61.  
44  
45  
46 46 Wang W, Wu C, Mu Z, *et al.* Effect of ambient air pollution exposure on renal dysfunction  
47  
48 among hospitalized patients in Shanghai, China. *Public Health*; **181**:196-201.  
49  
50  
51 47 Jung-Wei C, Horng-Yih O, Hsiu-Ling C, *et al.* Hyperuricemia after exposure to  
52  
53 polychlorinated dibenzo-p-dioxins and dibenzofurans near a highly contaminated area.  
54  
55  
56  
57  
58  
59  
60  
*Epidemiology* 2013;**24**:582-9.

- 1  
2  
3  
4 48 Monda KL, Gordon-Larsen P, Stevens J, *et al.* China's transition: The effect of rapid  
5  
6 urbanization on adult occupational physical activity. *Soc Sci Med* 2007;**64**:858-70.  
7  
8  
9 49 Giuseppe L, Giorgio B, Massimo F, *et al.* Comparison of serum creatinine, uric acid,  
10  
11 albumin and glucose in male professional endurance athletes compared with healthy controls.  
12  
13 *Clin Chem Lab Med* 2004;**42**:644-7.  
14  
15  
16  
17 50 Shi M, Wang X, Yamanaka T, *et al.* Effects of anaerobic exercise and aerobic exercise on  
18  
19 biomarkers of oxidative stress. *Environ Health Prev Med* 2007;**12**:202-8.  
20  
21  
22 51 Inoue Y, Howard AG, Thompson AL, *et al.* The association between urbanization and  
23  
24 reduced renal function: findings from the China Health and Nutrition Survey. *BMC Nephrol*  
25  
26 2017;**18**:160.  
27  
28  
29  
30 52 Ali N, Mahmood S, Islam F, *et al.* Relationship between serum uric acid and hypertension:  
31  
32 a cross-sectional study in Bangladeshi adults. *Sci Rep* 2019;**9**:9061.  
33  
34  
35  
36  
37  
38  
39  
40  
41  
42  
43  
44  
45  
46  
47  
48  
49  
50  
51  
52  
53  
54  
55  
56  
57  
58  
59  
60

**Table 1 Basic characteristics of participants according to community-level urbanization index**

| Variables                                             | Low urbanized  | Medium urbanized | Highly urbanized | P value |
|-------------------------------------------------------|----------------|------------------|------------------|---------|
| <b>Number</b>                                         | 3554           | 2162             | 2863             |         |
| <b>SUA, mean (SD), <math>\mu\text{mol/L}</math></b>   | 5.02(1.69)     | 5.16(1.75)       | 5.42 (1.87)      | <0.001  |
| <b>HUA, n (%)</b>                                     | 435(12.2)      | 316(14.6)        | 567(19.8)        | <0.001  |
| <b>Age, mean (SD), year</b>                           | 50.29(14.76)   | 50.50(14.94)     | 52.15(15.37)     | <0.001  |
| <b>Male, n (%)</b>                                    | 1696(47.7)     | 1020(47.2)       | 1327(46.3)       | 0.549   |
| <b>Hypertension, n (%)</b>                            | 1169(32.9)     | 753(34.8)        | 1069(37.3)       | 0.001   |
| <b>DM, n (%)</b>                                      | 296(8.3)       | 258(11.9)        | 374(13.1)        | <0.001  |
| <b>High LDL-c, n (%)</b>                              | 1209(34.6)     | 1000(46.3)       | 1261(44.0)       | <0.001  |
| <b>Obesity, n (%)</b>                                 | 298(8.4)       | 212(9.8)         | 312(10.9)        | <0.001  |
| <b>eGFR, mean (SD), mL/min per 1.73 m<sup>2</sup></b> | 81.98(16.46)   | 78.71(16.88)     | 76.57(16.94)     | <0.001  |
| <b>CKD, n (%)</b>                                     | 307(8.6)       | 255(11.8)        | 437(15.3)        | <0.001  |
| <b>Smoking, n (%)</b>                                 | 1108(31.2)     | 558(25.8)        | 708(24.7)        | <0.001  |
| <b>Drinking, n (%)</b>                                | 791(22.3)      | 458(21.2)        | 536(18.7)        | <0.001  |
| <b>Physical activity, mean (SD), METs</b>             | 125.48(123.73) | 81.53(101.49)    | 51.71(72.26)     | <0.001  |

Continuous variables were expressed as the mean  $\pm$  SD and categorical variables were described as frequencies and percentages. The one-way ANOVA test (for continuous

variables) and  $\chi^2$  tests (for categorical variables) were used to compare the difference between different group. SUA, serum uric acid; HUA: hyperuricemia; DM, Diabetes mellitus;

LDL, low-density lipoprotein; eGFR, estimated glomerular filtration rate; CKD chronic kidney disease; MET, metabolic equivalent for task.

**Table 2 Factors associated with serum uric acid among Chinese adults**

|                                                             | Univariable         |                | Multivariable       |                         |
|-------------------------------------------------------------|---------------------|----------------|---------------------|-------------------------|
|                                                             | $\beta$ coefficient | <i>P</i> value | $\beta$ coefficient | Adjusted <i>P</i> value |
| <b>Age (every 10 years)</b>                                 | 0.019               | <0.001         | -0.028              | <0.001                  |
| <b>Gender (male vs. female)</b>                             | 0.287               | <0.001         | 0.290               | <0.001                  |
| <b>Hypertension (yes vs. no)</b>                            | 0.110               | <0.001         | 0.047               | <0.001                  |
| <b>DM (yes vs. no)</b>                                      | 0.124               | <0.001         | 0.067               | <0.001                  |
| <b>High LDL-c (yes vs. no)</b>                              | 0.031               | <0.001         | 0.004               | 0.743                   |
| <b>Obesity (yes vs. no)</b>                                 | 0.133               | <0.001         | 0.089               | <0.001                  |
| <b>CKD (yes vs. no)</b>                                     | 0.195               | <0.001         | 0.198               | <0.001                  |
| <b>Smoking (yes vs. no)</b>                                 | -0.018              | 0.307          | -                   | -                       |
| <b>Drinking (yes vs. no)</b>                                | 0.063               | <0.001         | 0.037               | 0.001                   |
| <b>Physical activity (every 10 METs)</b>                    | <0.001              | 0.700          | -                   | -                       |
| <b>Community-level urbanization index (every 10 points)</b> | 0.016               | <0.001         | 0.016               | <0.001                  |

The  $\beta$  coefficients and *P* values are from univariable and multivariable linear regression models of natural log-transformed uric acid as the dependent variable. The multivariable model included all covariates. DM, diabetes mellitus; LDL-c, low-density lipoprotein cholesterol; CKD, chronic kidney disease; MET, metabolic equivalent for task; –, without significance.

**Table 3 Association of urbanization and the risk of hyperuricemia among Chinese adults**

| Variables                        | Low urbanized | Medium urbanized   | Highly urbanized   |
|----------------------------------|---------------|--------------------|--------------------|
| hyperuricemia (%)                | 12.2          | 14.6               | 19.8               |
| P <sup>1</sup>                   |               | 0.009              | <0.001             |
| Odds ratio (95% CI) <sup>1</sup> | Ref.          | 1.234(1.055-1.445) | 1.767(1.539-2.028) |
| P <sup>2</sup>                   |               | 0.218              | <0.001             |
| Odds ratio (95% CI) <sup>2</sup> | Ref.          | 1.109(0.941-1.308) | 1.548(1.339-1.789) |
| P <sup>3</sup>                   |               | 0.363              | 0.001              |
| Odds ratio (95% CI) <sup>3</sup> | Ref.          | 1.160(0.842-1.599) | 1.661(1.246-2.212) |

<sup>1</sup>Model 1 was only controlled by age, gender.<sup>2</sup>Model 2 was controlled by hypertension, diabetes mellitus and high low-density lipoprotein, obesity and chronic kidney disease

based on Model 1.<sup>3</sup>Model 3 was controlled by health-related behaviors (smoking, drinking, physical activity) based on Model 2.

1  
2  
3  
4  
5  
6  
7  
8  
9  
10  
11  
12  
13  
14  
15  
16  
17  
18  
19  
20  
21  
22  
23  
24  
25  
26  
27  
28  
29  
30  
31  
32  
33  
34  
35  
36  
37  
38  
39  
40  
41  
42  
43  
44  
45  
46

For peer review only



## Figure Legend

**Figure1** Flowchart of the sample selecting methods at each step.

**Figure2** Adjusted odds ratios for hyperuricemia with high urbanicity according to baseline characteristics. Analyses were adjusted for age, gender, hypertension, diabetes mellitus, high LDL (high low-density lipoprotein), obesity, chronic kidney disease, smoking, drinking and physical activity, as appropriate. The square black boxes represent odds ratios, and the horizontal lines represent 95% confidence intervals. The triangle black boxes represent the overall odds ratios and 95% confidence intervals.

1  
2  
3  
4  
5  
6  
7  
8  
9  
10  
11  
12  
13  
14  
15  
16  
17  
18  
19  
20  
21  
22  
23  
24  
25  
26  
27  
28  
29  
30  
31  
32  
33  
34  
35  
36  
37  
38  
39  
40  
41  
42  
43  
44  
45  
46  
47  
48  
49  
50  
51  
52  
53  
54  
55  
56  
57  
58  
59  
60

For peer review only

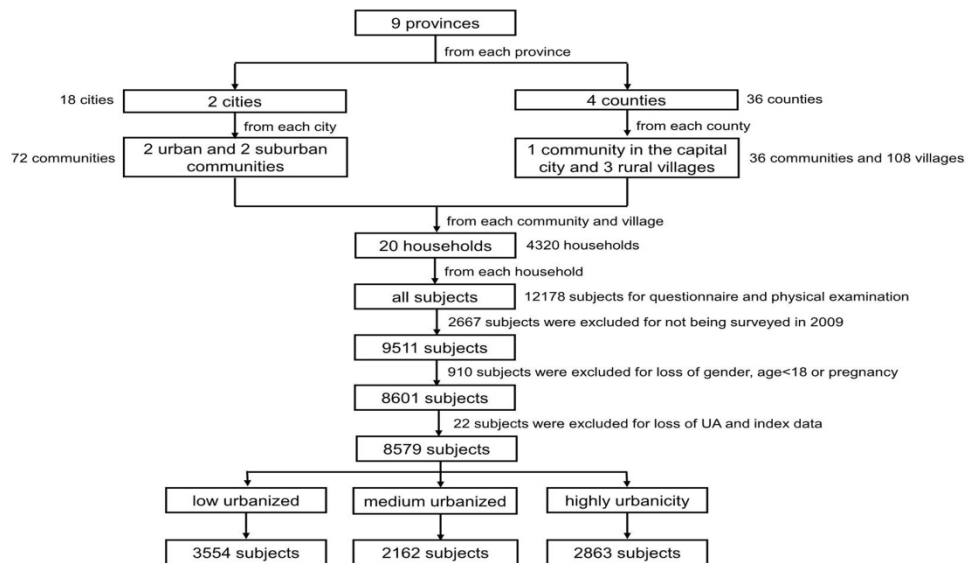

Flowchart of the sample selecting methods at each step

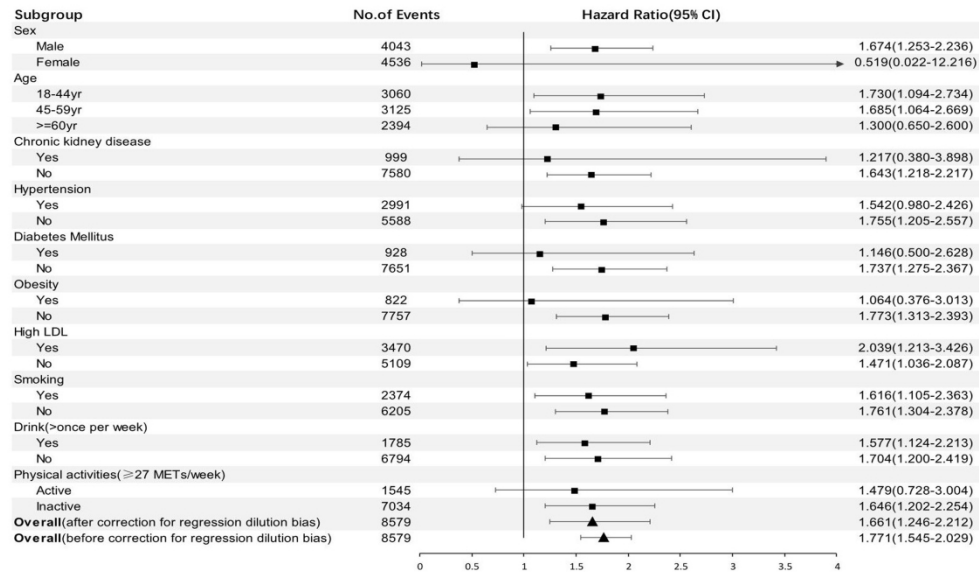

Adjusted odds ratios for hyperuricemia with high urbanicity according to baseline characteristics.

STROBE Statement—Checklist of items that should be included in reports of *cross-sectional studies*

|                              | Item No | Recommendation                                                                                                                                                                                               | Page No |
|------------------------------|---------|--------------------------------------------------------------------------------------------------------------------------------------------------------------------------------------------------------------|---------|
| <b>Title and abstract</b>    | 1       | (a) Indicate the study's design with a commonly used term in the title or the abstract                                                                                                                       | 2       |
|                              |         | (b) Provide in the abstract an informative and balanced summary of what was done and what was found                                                                                                          | 3-5     |
| <b>Introduction</b>          |         |                                                                                                                                                                                                              |         |
| Background/rationale         | 2       | Explain the scientific background and rationale for the investigation being reported                                                                                                                         | 5       |
| Objectives                   | 3       | State specific objectives, including any prespecified hypotheses                                                                                                                                             | 5-6     |
| <b>Methods</b>               |         |                                                                                                                                                                                                              |         |
| Study design                 | 4       | Present key elements of study design early in the paper                                                                                                                                                      | 6-11    |
| Setting                      | 5       | Describe the setting, locations, and relevant dates, including periods of recruitment, exposure, follow-up, and data collection                                                                              | 6-8     |
| Participants                 | 6       | (a) Give the eligibility criteria, and the sources and methods of selection of participants                                                                                                                  | 6-7     |
| Variables                    | 7       | Clearly define all outcomes, exposures, predictors, potential confounders, and effect modifiers. Give diagnostic criteria, if applicable                                                                     | 9-11    |
| Data sources/<br>measurement | 8*      | For each variable of interest, give sources of data and details of methods of assessment (measurement). Describe comparability of assessment methods if there is more than one group                         | 8-11    |
| Bias                         | 9       | Describe any efforts to address potential sources of bias                                                                                                                                                    | 11      |
| Study size                   | 10      | Explain how the study size was arrived at                                                                                                                                                                    | 6-7     |
| Quantitative variables       | 11      | Explain how quantitative variables were handled in the analyses. If applicable, describe which groupings were chosen and why                                                                                 | 11      |
| Statistical methods          | 12      | (a) Describe all statistical methods, including those used to control for confounding                                                                                                                        | 8-11    |
|                              |         | (b) Describe any methods used to examine subgroups and interactions                                                                                                                                          | 11      |
|                              |         | (c) Explain how missing data were addressed                                                                                                                                                                  | 11      |
|                              |         | (d) If applicable, describe analytical methods taking account of sampling strategy                                                                                                                           | 11      |
|                              |         | (e) Describe any sensitivity analyses                                                                                                                                                                        | 11      |
| <b>Results</b>               |         |                                                                                                                                                                                                              |         |
| Participants                 | 13*     | (a) Report numbers of individuals at each stage of study—eg numbers potentially eligible, examined for eligibility, confirmed eligible, included in the study, completing follow-up, and analysed            | 6-7     |
|                              |         | (b) Give reasons for non-participation at each stage                                                                                                                                                         | 6-7     |
|                              |         | (c) Consider use of a flow diagram                                                                                                                                                                           | 7       |
| Descriptive data             | 14*     | (a) Give characteristics of study participants (eg demographic, clinical, social) and information on exposures and potential confounders                                                                     | 12      |
|                              |         | (b) Indicate number of participants with missing data for each variable of interest                                                                                                                          | 7       |
| Outcome data                 | 15*     | Report numbers of outcome events or summary measures                                                                                                                                                         | 12      |
| Main results                 | 16      | (a) Give unadjusted estimates and, if applicable, confounder-adjusted estimates and their precision (eg, 95% confidence interval). Make clear which confounders were adjusted for and why they were included | 12-13   |

|                          |    |                                                                                                                                                                            |       |
|--------------------------|----|----------------------------------------------------------------------------------------------------------------------------------------------------------------------------|-------|
|                          |    | (b) Report category boundaries when continuous variables were categorized                                                                                                  | 12    |
|                          |    | (c) If relevant, consider translating estimates of relative risk into absolute risk for a meaningful time period                                                           | 13    |
| Other analyses           | 17 | Report other analyses done—eg analyses of subgroups and interactions, and sensitivity analyses                                                                             | 13    |
| <b>Discussion</b>        |    |                                                                                                                                                                            |       |
| Key results              | 18 | Summarise key results with reference to study objectives                                                                                                                   | 14    |
| Limitations              | 19 | Discuss limitations of the study, taking into account sources of potential bias or imprecision. Discuss both direction and magnitude of any potential bias                 | 16-17 |
| Interpretation           | 20 | Give a cautious overall interpretation of results considering objectives, limitations, multiplicity of analyses, results from similar studies, and other relevant evidence | 14-17 |
| Generalisability         | 21 | Discuss the generalisability (external validity) of the study results                                                                                                      | 16-17 |
| <b>Other information</b> |    |                                                                                                                                                                            |       |
| Funding                  | 22 | Give the source of funding and the role of the funders for the present study and, if applicable, for the original study on which the present article is based              | 19    |

\*Give information separately for exposed and unexposed groups.

**Note:** An Explanation and Elaboration article discusses each checklist item and gives methodological background and published examples of transparent reporting. The STROBE checklist is best used in conjunction with this article (freely available on the Web sites of PLoS Medicine at <http://www.plosmedicine.org/>, Annals of Internal Medicine at <http://www.annals.org/>, and Epidemiology at <http://www.epidem.com/>). Information on the STROBE Initiative is available at [www.strobe-statement.org](http://www.strobe-statement.org).

# BMJ Open

## Association between urbanization and the risk of hyperuricemia among Chinese adults: a cross-sectional study from the China Health and Nutrition Survey (CHNS)

|                                 |                                                                                                                                                                                                                                                                                                                                                                                                                                                                                                                                                                                                                                                                    |
|---------------------------------|--------------------------------------------------------------------------------------------------------------------------------------------------------------------------------------------------------------------------------------------------------------------------------------------------------------------------------------------------------------------------------------------------------------------------------------------------------------------------------------------------------------------------------------------------------------------------------------------------------------------------------------------------------------------|
| Journal:                        | <i>BMJ Open</i>                                                                                                                                                                                                                                                                                                                                                                                                                                                                                                                                                                                                                                                    |
| Manuscript ID                   | bmjopen-2020-044905.R2                                                                                                                                                                                                                                                                                                                                                                                                                                                                                                                                                                                                                                             |
| Article Type:                   | Original research                                                                                                                                                                                                                                                                                                                                                                                                                                                                                                                                                                                                                                                  |
| Date Submitted by the Author:   | 04-Feb-2021                                                                                                                                                                                                                                                                                                                                                                                                                                                                                                                                                                                                                                                        |
| Complete List of Authors:       | Yu, Xixi; Zhongshan Hospital Fudan University, Zhu, Cheng; Zhongshan Hospital Fudan University Zhang, Han; Zhongshan Hospital Fudan University, Nephrology Shen, Ziyang; Zhongshan Hospital Fudan University, Nephrology Chen, Jing; Zhongshan Hospital Fudan University, Nephrology Gu, Yulu; Zhongshan Hospital Fudan University, Nephrology Lv, Shiqi; Zhongshan Hospital Fudan University, Nephrology Zhang, Di; Zhongshan Hospital Fudan University, Nephrology Wang, Yulin; Zhongshan Hospital Fudan University, Nephrology Ding, Xiaoqiang; Zhongshan Hospital Fudan University, Nephrology Zhang, Xiaoyan; Zhongshan Hospital Fudan University, Nephrology |
| <b>Primary Subject Heading</b>: | Public health                                                                                                                                                                                                                                                                                                                                                                                                                                                                                                                                                                                                                                                      |
| Secondary Subject Heading:      | Epidemiology                                                                                                                                                                                                                                                                                                                                                                                                                                                                                                                                                                                                                                                       |
| Keywords:                       | PUBLIC HEALTH, EPIDEMIOLOGY, RHEUMATOLOGY                                                                                                                                                                                                                                                                                                                                                                                                                                                                                                                                                                                                                          |
|                                 |                                                                                                                                                                                                                                                                                                                                                                                                                                                                                                                                                                                                                                                                    |

SCHOLARONE™  
Manuscripts



I, the Submitting Author has the right to grant and does grant on behalf of all authors of the Work (as defined in the below author licence), an exclusive licence and/or a non-exclusive licence for contributions from authors who are: i) UK Crown employees; ii) where BMJ has agreed a CC-BY licence shall apply, and/or iii) in accordance with the terms applicable for US Federal Government officers or employees acting as part of their official duties; on a worldwide, perpetual, irrevocable, royalty-free basis to BMJ Publishing Group Ltd ("BMJ") its licensees and where the relevant Journal is co-owned by BMJ to the co-owners of the Journal, to publish the Work in this journal and any other BMJ products and to exploit all rights, as set out in our [licence](#).

The Submitting Author accepts and understands that any supply made under these terms is made by BMJ to the Submitting Author unless you are acting as an employee on behalf of your employer or a postgraduate student of an affiliated institution which is paying any applicable article publishing charge ("APC") for Open Access articles. Where the Submitting Author wishes to make the Work available on an Open Access basis (and intends to pay the relevant APC), the terms of reuse of such Open Access shall be governed by a Creative Commons licence – details of these licences and which [Creative Commons](#) licence will apply to this Work are set out in our licence referred to above.

Other than as permitted in any relevant BMJ Author's Self Archiving Policies, I confirm this Work has not been accepted for publication elsewhere, is not being considered for publication elsewhere and does not duplicate material already published. I confirm all authors consent to publication of this Work and authorise the granting of this licence.



1  
2  
3  
4 **Association between urbanization and the risk of hyperuricemia among**  
5  
6 **Chinese adults: a cross-sectional study from the China Health and**  
7  
8 **Nutrition Survey (CHNS)**  
9

10  
11 Xixi Yu<sup>1,2,4#</sup>, Cheng Zhu<sup>1#</sup>, Han Zhang<sup>1,2,4</sup>, Ziyang Shen<sup>1,2,4</sup>, Jing Chen<sup>1,2,3</sup>, Yulu  
12  
13 Gu<sup>1,2,3</sup>, Shiqi Lv<sup>1,2,4</sup>, Di Zhang<sup>1,2,3</sup>, Yulin Wang<sup>1,2,3</sup>, Xiaoqiang Ding<sup>1,2,3,4\*</sup>,  
14  
15  
16 Xiaoyan Zhang<sup>1,2,3,4\*</sup>  
17

18  
19 <sup>1</sup> Department of Nephrology, Zhongshan Hospital, Fudan University, Shanghai,  
20  
21  
22 China.  
23

24  
25 <sup>2</sup> Shanghai Medical Center of Kidney Disease, Shanghai, China.  
26

27  
28 <sup>3</sup> Shanghai Key Laboratory of Kidney and Blood Purification, Shanghai, China.  
29

30  
31 <sup>4</sup> Shanghai Institute of Kidney and Dialysis, Shanghai, China.  
32

33  
34 # These authors contributed equally to this work

35  
36 **Key words:** urbanization, hyperuricemia, the China Health and Nutrition  
37  
38 Survey  
39

40  
41 **Corresponding author:**  
42

43  
44 \*Xiaoyan Zhang, Kidney and Dialysis Institute of Shanghai, No. 136 Medical  
45  
46 College Road, Shanghai 200032, China. E-mail: ZS\_XYZhang@163.com; Tel.  
47  
48 / fax: +86-21-64038472  
49

50  
51 \*Xiaoqiang Ding, Department of Nephrology, Zhongshan Hospital, Fudan  
52  
53 University, No. 180 Fenglin Road, Shanghai 200032, China. E-mail:  
54  
55 ding.xiaoqiang2015@hotmail.com; Tel. / fax: +86-21-64038472  
56  
57

58  
59 **Running title:** urbanization and hyperuricemia  
60

1  
2  
3  
4 **Word count:2649**

5  
6 **Abstract:240**

7  
8  
9 **Number of references:52**

10  
11 **Number of figures and tables:5**

12  
13  
14  
15  
16  
17 No additional data available.

18  
19  
20  
21  
22 **Abstract**

23  
24 **Objectives** To explore the association between urbanicity and hyperuricemia  
25 (HUA) and whether urbanicity is an independent risk factor of HUA in Chinese  
26 adults.  
27  
28  
29

30  
31  
32 **Design** Data analysis from a cross-sectional survey.

33  
34  
35 **Setting and participants** 8579 subjects ages 18 years or older were enrolled  
36 in the study from the 2009 wave of the China Health and Nutrition Survey to  
37 analyze the association between urbanicity and hyperuricemia. We divided  
38 them into three categories according to urbanization index (low, medium, and  
39 highly urbanized groups).  
40  
41  
42  
43  
44  
45  
46

47  
48 **Main outcome measures** HUA was defined as serum uric acid  $\geq 7$  mg/dL in  
49 men and  $\geq 6$  mg/dL in women.  
50  
51

52  
53 **Results** The prevalence of HUA in low, medium, and highly urbanized groups  
54 was 12.2%, 14.6%, and 19.8% respectively. The independent factors  
55 influencing serum uric acid included age, gender, hypertension, diabetes,  
56  
57  
58  
59  
60

1  
2  
3  
4 chronic kidney disease, drinking, obesity, and community-level urbanization  
5  
6 index(  $\beta = 0.016$ ,  $p < 0.001$ ). The risk of HUA in the highly urbanized group was  
7  
8 significantly higher than that of the low urbanized group (OR 1.771, 95%CI  
9  
10 1.545-2.029,  $P < 0.001$ ), even after adjusting for other covariates (OR 1.661,  
11  
12 95%CI 1.246-2.212,  $P = 0.001$ ). In subgroup analysis, we found that age, gender,  
13  
14 comorbidity (such as hypertension, diabetes, obesity, and chronic kidney  
15  
16 disease), and physical activity affected the association between urbanization  
17  
18 and the risk of HUA.  
19  
20  
21  
22  
23  
24

25 **Conclusions** Our findings suggest that living in highly urbanized areas is linked  
26  
27 with higher risk of hyperuricemia independent of cardiometabolic and health-  
28  
29 related behavioral risk factors, which have been shown to increase along with  
30  
31 urbanization.  
32  
33  
34

### 35 36 37 **Strengths and limitations of this study**

- 38 ● The present study used the 2009 wave of the China Health and Nutrition  
39  
40 Survey which represented 47% of China's population.  
41  
42
- 43 ● Regression models were used to explore the associations between  
44  
45 urbanization and the risk of hyperuricemia in Chinese adults.  
46  
47
- 48 ● The association in the female group could be impacted due to a significant  
49  
50 amount of missing smoking data.  
51  
52  
53  
54  
55  
56  
57  
58  
59  
60

- Even with self-reported history, physicals, and laboratory examinations, the real prevalence of hypertension and diabetes mellitus might be under-reported.

## Introduction

In recent decades, with the changes in diet and lifestyle as the economy develops, the prevalence of hyperuricemia(HUA) has increased rapidly[1]. In 2014, the prevalence of hyperuricemia in Chinese adults was 13.3% [2]. Hyperuricemia is both an independent risk factor for new-onset chronic kidney disease (CKD)[3], as well as CKD progression[4, 5]. Males and females with hyperuricemia have four and nine times increase in the risk of end-stage renal disease, respectively[6]. Furthermore, hyperuricemia was reported to increase the risk of diabetes mellitus [7], hypertension[8], dyslipidemia[9], and cardiovascular events, especially sudden cardiac death[10, 11].

Urbanicity was confirmed to have an influence on health through nutrition and lifestyle choices, pollution, occupational and traffic hazards, and sanitary conditions such as health-care access and vaccination coverage[12, 13]. Several studies have found that pollution[14], drinking[15], smoking[16], reduced physical activity[17, 18],and fructose intake[19], were all associated with HUA. Furthermore, some studies have found that renal function was related to urbanicity [20, 21].The causes of HUA include increased urate generation, decreased urate excretion or a combination of both factors. Two-

1  
2  
3  
4 thirds of urate is excreted through the kidney into urine [22]. Reduced renal  
5  
6 function can significantly increase the risk of hyperuricemia[23, 24].  
7

8  
9 Few studies had investigated the relationship between urbanicity and HUA.

10  
11 To explore this association, we used data from the China Health and Nutrition  
12  
13 Survey (CHNS) and designed a multilevel model to explore whether urbanicity  
14  
15 is an independent risk factor of hyperuricemia.  
16  
17

## 18 19 20 21 22 **Materials and Methods**

### 23 24 25 **Sampling and Participants**

26  
27 Sampling in the present study came from the survey of China Health and  
28  
29 Nutrition Survey (CHNS) in 2009. The CHNS is a longitudinal study of nine  
30  
31 Chinese provinces (Guizhou, Guangxi, Heilongjiang, Henan, Hubei, Hunan,  
32  
33 Liaoning, Jiangsu, and Shandong). Nine surveys have been conducted since  
34  
35 1989[25]. By 2011, the provinces included in the CHNS represented 47% of  
36  
37 China's population according to the 2010 census. The CHNS was designed to  
38  
39 provide representation of urban, suburban, and rural areas varying significantly  
40  
41 in economic development, public resources, geography, and health indicators,  
42  
43 and to focus on health during urbanization and economic change[26]. We  
44  
45 selected a stratified probability sample from the nine provinces using a  
46  
47 multistage, random-cluster design. Using this sampling strategy, we selected  
48  
49 two cities from each province (one large city, usually the provincial capital, and  
50  
51 one small city, usually a lower income city) and four counties (stratified by  
52  
53  
54  
55  
56  
57  
58  
59  
60

1  
2  
3  
4 income: one high, one low, and two middle-income counties). Within cities, we  
5  
6 randomly selected two urban and two suburban communities; within counties,  
7  
8 we randomly selected one community in the capital city and three rural villages.  
9  
10 In each community, we selected 20 households at random and all household  
11  
12 members were interviewed. The 2009 wave consisted of 216 communities and  
13  
14 included 36 urban neighborhoods, 36 suburban neighborhoods, 36 towns, and  
15  
16 108 villages. Current study population included 8579 participants ages 18 years  
17  
18 and older and the selection procedures are depicted in Figure 1.  
19  
20  
21  
22  
23  
24  
25  
26

### 27 **Urbanicity scale**

28  
29  
30 Urbanicity was defined using a 12-component index capturing community-level  
31  
32 physical, social, cultural, and economic environments designed and validated  
33  
34 for the CHNS[26]. The following 12 components were included in the  
35  
36 development of the urbanization index: 1. population density; 2. types of  
37  
38 economic activity; 3. traditional market; 4. modern markets; 5. transportation  
39  
40 and infrastructure; 6. sanitation; 7. communication and media (e.g., TV, mobile,  
41  
42 post, and cinema); 8. housing (e.g., electricity, indoor tap water, and flushing  
43  
44 toilets); 9. education; 10. diversity (i.e., variation in community education level  
45  
46 and variation in community income level); 11. health infrastructure; 12. social  
47  
48 services. This scale represents abroad-based factors of modernization that  
49  
50 have potential health effects. Heterogeneity was captured by components in  
51  
52 the presence/absence or number of facilities within the community, access to  
53  
54  
55  
56  
57  
58  
59  
60

1  
2  
3  
4 media or infrastructure, facility characteristics, and the average proportion of  
5  
6 individuals and households having a specific education or income level. We  
7  
8 obtained the variables measuring proportion of households from the CHNS  
9  
10 responses. Using the CHNS community-level survey offered to community  
11  
12 officials, we derived the remaining variables as described by Jones-Smith and  
13  
14 Popkin. Scoring distributions were variable across components, so the median  
15  
16 score in a middle year was designated as half the total points and each of the  
17  
18 components was scaled from 0 to 10 [27, 28]. Each component was then  
19  
20 weighted equally in the overall index and added together for an overall  
21  
22 maximum possible score of 120. This scale has been validated for content  
23  
24 validity, reliability ( $\alpha=0.85\sim0.89$  across all study years), and stability across  
25  
26 study years( $r=0.90\sim0.94$ ). Since the community-level urbanization indexes in  
27  
28 the population we studied ranged from 30.4 to 106.6, all participants were  
29  
30 divided into low ( $<55.01$ ), medium ( $\geq 55.01$  and  $<82.33$ ), and highly ( $\geq 82.33$ )  
31  
32 urbanized groups by their community-level urbanization index tertiles  
33  
34 accordingly.  
35  
36  
37  
38  
39  
40  
41  
42  
43  
44  
45  
46  
47

### 48 **Definition of hyperuricemia**

49  
50 After at least 12 hours of overnight fasting, a blood sample was collected by  
51  
52 venipuncture in the morning. Four mL of the blood sample was collected into a  
53  
54 tube with separating gel and was centrifuged 30 min after collection at  $3000\times g$   
55  
56 for 15 min; the serum sample obtained from the centrifugation was frozen and  
57  
58  
59  
60

1  
2  
3  
4 stored at -86°C for laboratory analysis. Another blood sample (500µL) was  
5  
6 collected into a tube with EDTA for routine blood examination. All samples were  
7  
8 verified and analyzed in a national central lab in Beijing (medical laboratory  
9  
10 accreditation certificate ISO 15189:2007) according to strict quality control  
11  
12 standard[29]. Serum uric acid (SUA) concentrations were measured with the  
13  
14 use of an enzymatic colorimetric method on a Hitachi 7600 automated analyzer  
15  
16 (Hitachi Inc., Tokyo, Japan) by determiner reagents (Randox Laboratories Ltd.,  
17  
18 Crumlin, UK). HUA was defined as SUA concentrations  $\geq 7$  mg/dL in men and  
19  
20  $\geq 6$  mg/dL in women[1, 29-32].  
21  
22  
23  
24  
25  
26  
27  
28  
29

### 30 **Assessment of covariates**

31  
32 Self-reported medical history including hypertension, diabetes mellitus or high  
33  
34 blood sugar, and lifestyle information such as smoking, and drinking was  
35  
36 collected by trained interviewers. Hypertension was defined as either systolic  
37  
38 pressure  $\geq 140$  mmHg, diastolic pressure  $\geq 90$  mmHg, or self-reported  
39  
40 diagnosis of hypertension[33]. Diabetes mellitus (DM) was defined as either  
41  
42 fasting blood glucose  $\geq 126$  mg/dL (7.0 mmol/L) or glycosylated hemoglobin  $\geq$   
43  
44 6.5%, or self-reported diagnosis of DM[34]. High level of low-density lipoprotein  
45  
46 cholesterol (LDL-c) was defined as  $\geq 3.12$  mmol/L[35]. To accurately estimate  
47  
48 kidney function, we referred to CKD-EPI equation to calculate the estimated  
49  
50 glomerular filtration rate (eGFR):  $eGFR = 141 \times \min(SCr/k, 1)^\alpha \times \max(SCr/k, 1)^{-$   
51  
52  $1.209 \times 0.993^{Age} \times 1.021$  [if female]  $\times 1.159$  [if black], where SCr is serum  
53  
54  
55  
56  
57  
58  
59  
60



1  
2  
3  
4 creatinine,  $\kappa$  is 0.7 for females and 0.9 for males,  $\alpha$  is -0.329 for females and -  
5  
6 0.411 for males, min indicates the minimum of  $SCr/\kappa$  or 1, and max indicates  
7  
8 the maximum of  $SCr/\kappa$  or 1[36]. Chronic kidney disease(CKD) was defined as  
9  
10 eGFR < 60 mL/min/1.73 m<sup>2</sup> according to Kidney Disease: Improving Global  
11  
12 Outcomes (KDIGO) 2012 Clinical Practice Guideline for the Evaluation and  
13  
14 Management of Chronic Kidney Disease[36]. From physical examination, we  
15  
16 obtained the participants' body weight and height. Body mass index (BMI) was  
17  
18 calculated as weight(kg) divided by height squared, and was classified into  
19  
20 normal or overweight (BMI < 28.0kg/m<sup>2</sup>), and obese (BMI  $\geq$  28.0 kg/m<sup>2</sup>)[37].  
21  
22 Physical activity included domestic activity (such as washing clothes, grocery  
23  
24 shopping), occupation activity, transportation activity (such as walking or driving  
25  
26 to work), leisure activity (such as kung fu, swimming, playing football)[38, 39],  
27  
28 which was estimated by metabolic equivalent for task (MET). MET is a unit that  
29  
30 estimates the amount of energy used by the body during physical activity,  
31  
32 relative to resting metabolism. The unit is standardized so it can apply to people  
33  
34 of varying body weight participating indifferent activities[40]. Active or inactive  
35  
36 group was defined as  $\geq$ / $<$  27 METs/week according to the physical activity  
37  
38 level[29].The data of alcohol consumption and smoking status of the  
39  
40 participants also could be attained from the CHNS and was classified as "yes"  
41  
42 ( $\geq$  once per week) or "no" (<once per week) in our analysis.  
43  
44  
45  
46  
47  
48  
49  
50  
51  
52  
53  
54  
55  
56  
57  
58  
59  
60

### Statistical analysis

1  
2  
3  
4 Continuous variables were presented as means  $\pm$  standard deviation (SD),  
5  
6 while frequencies and percentages were used as categorical variables. The  
7  
8 one-way ANOVA test (for continuous variables) and  $\chi^2$  tests (for categorical  
9  
10 variables) were used to compare the difference of HUA, age, gender,  
11  
12 cardiometabolic risk factors (hypertension, diabetes mellitus, high level of LDL-  
13  
14 c, obesity, CKD), and health-related behaviors (drinking, smoking, physical  
15  
16 activity) among groups, respectively. Additionally, the associations of uric acid  
17  
18 with variables were tested using Spearman correlation coefficients in  
19  
20 unadjusted and multivariable-adjusted linear regression models.  
21  
22

23  
24  
25  
26  
27 The method of maximum likelihood by the binary logistics regression model  
28  
29 was used to analyze the relationship between the risk of HUA in adulthood and  
30  
31 community-level urbanization exposure. In the multivariable logistic regression  
32  
33 model, we adjusted for age, gender, CKD, health-related behaviors, and  
34  
35 cardiometabolic risk factors. Model 1 was only controlled by age and gender,  
36  
37 Model 2 was controlled for factors from model 1 plus cardiometabolic risk  
38  
39 factors (obesity, hypertension, DM, high LDL, obesity, and CKD). For Model 3,  
40  
41 health-related behaviors (smoking, drinking, and physical activity) were added  
42  
43 for adjustment. All statistical analysis was conducted using the Statistical  
44  
45 Package for the Social Sciences 13.0 (SPSS Inc., Chicago, IL, USA). The data  
46  
47 was demonstrated as odds ratio (OR) and 95% confidence interval (CI). A two-  
48  
49 side p value  $<0.05$  was considered significant.  
50  
51  
52  
53  
54  
55  
56  
57  
58  
59  
60

## Results

### Characteristics of participants by tertiles of community-level urbanization index

A total of 8579 participants were enrolled into the current study. Basic characteristics of the participants are presented in Table 1. The prevalence of HUA rose with the urbanization scale (from 12.2% to 14.6% to 19.8%,  $p<0.001$ ), as did the trend of mean SUA levels (from 5.02 to 5.16 to 5.42,  $p<0.001$ ).

As urbanization increased, renal function declined dramatically (eGFR reduced from 81.98 to 78.71 to 76.57,  $p<0.001$ ). In terms of cardiometabolic risk factors, subjects who lived in more urbanized communities were prone to hypertension, diabetes mellitus, high LDL-c, and obesity. For the perspective of health-related behaviors, those subjects from highly urbanized areas tended to smoke less, drink less, and be less physically active compared with low urbanized areas.

### Risk factors associated with serum uric acid among Chinese adults.

Table 2 shows the results of the univariable and multivariable linear regression analyses between serum uric acid and age, gender, cardiometabolic risk factors, and health-related behaviors. The independent factors influencing serum uric acid included age, gender, hypertension, DM, obesity, CKD, drinking, and community-level urbanization index. Males, drinking individuals, individuals with cardiometabolic risk factors (such as hypertension, diabetes, obesity, and

1  
2  
3  
4 CKD), and individuals who lived in a community with higher urbanization index  
5  
6 tended to have higher serum uric acid.  
7  
8  
9

## 10 11 **Association of urbanization and the risk of hyperuricemia among Chinese** 12 13 **adults** 14

15  
16 The association of urbanization with HUA in Chinese adults is demonstrated in  
17  
18 Table 3. Compared with low urbanized group, the prevalence of HUA in medium  
19  
20 and highly urbanized groups showed significant difference in univariate  
21  
22 analysis, as shown in Table 1. Even after adjusting by age, gender,  
23  
24 cardiometabolic risk factors, and health-related behaviors, the highly urbanized  
25  
26 group still had higher risk of HUA compared with low urbanized group (OR  
27  
28 1.661, 95%CI 1.246-2.212, P=0.001). Furthermore, by subgroup analysis of the  
29  
30 low and highly urbanized, age, gender, comorbidities (such as hypertension,  
31  
32 diabetes, obesity, and CKD), and physical activity were suggested to affect the  
33  
34 association between urbanization and the risk of HUA (Figure 2). Young and  
35  
36 middle-aged males living in the community with higher community-level  
37  
38 urbanization index were prone to higher risk of HUA. Such association also  
39  
40 existed in individuals without hypertension, diabetes, obesity, or CKD and  
41  
42 individuals with less physical activity.  
43  
44  
45  
46  
47  
48  
49  
50  
51  
52  
53  
54

## 55 **Discussion** 56 57 58 59 60

1  
2  
3  
4 In the current study, we found that individuals living in highly urbanized areas  
5  
6 were prone to higher risk of HUA. The association between urbanicity and HUA  
7  
8 remained after adjusting for age, gender, and cardiometabolic/health-related  
9  
10 behavioral risk factors.  
11  
12

13  
14 Several potential mechanisms could explain the associations between high  
15  
16 urbanicity and HUA. High pollution levels are present in highly urbanized  
17  
18 areas[41-43]. Previous studies had shown that air pollution in China is mainly  
19  
20 caused by population aggregation, urbanization, industrial discharges, outside  
21  
22 investment, vehicle exhausts, coal consumption, technological development  
23  
24 and straw burning[44, 45]. Air pollution was reportedly associated with lower  
25  
26 eGFR and increased prevalence of CKD, thus increasing the risk of  
27  
28 hyperuricemia[46]. Furthermore, previous studies have confirmed that the air  
29  
30 pollution contained toxic organic agents including polychlorinated biphenyls  
31  
32 (PCBs), polycyclic aromatic hydrocarbons (PAHs), perfluorinated alkyl  
33  
34 substances (PFASa), and dioxins, which can increase serum uric acid  
35  
36 concentrations and the incidence of HUA[47]. Exposure to greater  
37  
38 concentrations of long-term ambient air pollutants has been confirmed to be  
39  
40 associated with a higher incidence of hyperuricemia[14].  
41  
42  
43  
44  
45  
46  
47  
48  
49

50 High urbanicity is accompanied with less physical activity. As found in our study,  
51  
52 physical activity declined with the increase of urbanicity. In highly urbanized  
53  
54 areas, occupational physical activity is less common, as well as the  
55  
56 transportation and domestic activity, due to the popularity of motorized  
57  
58  
59  
60

1  
2  
3  
4 transportation and household appliances[48]. Physical exercise is closely  
5  
6 associated with serum uric acid, as levels within professional endurance  
7  
8 athletes are significantly lower than non-athletes[49]. After aerobic exercise,  
9  
10 serum uric acid increases immediately and then decreases to a level even lower  
11  
12 than pre-exercise level as energy-rich purine phosphates are transiently  
13  
14 accumulated and catabolized, followed by the lasting-long depletion[50]. In our  
15  
16 study, inadequate physical activity in individuals living in more urbanized  
17  
18 communities increase the risk of HUA.  
19  
20  
21  
22  
23

24 High urbanicity is associated with decreased kidney function. A previous study  
25  
26 which included a large population revealed the higher risk of CKD in the higher  
27  
28 urbanicity community[51]. As demonstrated in Table 1, the highly urbanized  
29  
30 group had the highest prevalence of CKD. Kidney function is responsible for  
31  
32 uric acid excretion and SUA, which was consistent with Table 2. The serum uric  
33  
34 acid level of patients with CKD was higher than those without CKD.  
35  
36  
37  
38  
39

40 Urbanization has associations with other non-communicable diseases, such as  
41  
42 diabetes, hypertension, high LDL-c, cardiovascular disease, cancer, and  
43  
44 neuropsychiatric disorders resulting from the changes in human activity, diet,  
45  
46 and social structures in China[13]. These diseases can also increase the risk  
47  
48 of HUA [1, 7, 11, 52].  
49  
50  
51  
52

53 In addition, we also found that age, gender, comorbidity (such as hypertension,  
54  
55 diabetes, obesity, and CKD), and physical activity affect the association  
56  
57 between urbanization and the risk of HUA. Young and middle-aged men living  
58  
59  
60

1  
2  
3  
4 in the community with high community-level urbanization index are prone to  
5  
6 higher risk of HUA. Such association also exists in individuals without  
7  
8 hypertension, diabetes, obesity, and CKD and in individuals with less physical  
9  
10 activity, suggesting that in more urbanized areas, individuals without traditional  
11  
12 risk factors still have higher risk of HUA. The interaction between urbanicity and  
13  
14 hypertension, diabetes, obesity, and CKD might conceal the relationship  
15  
16 between urbanicity and HUA in these subgroups.  
17  
18  
19  
20

21  
22 A strength of our study is that the CHNS data we analyzed in our survey is  
23  
24 widely representative of the entire Chinese mainland. In addition, the innovative  
25  
26 grouping and stratifying methods make it clear to distinguish the exact stage in  
27  
28 which urbanicity exerts influences on HUA.  
29  
30

31  
32 Our study also has some limitations. First, elderly individuals in our study tend  
33  
34 to have lower serum uric acid. Reduced kidney function, hypertension, and  
35  
36 diabetes can increase the risk of HUA and are common in elderly individuals.  
37  
38

39  
40 However, elderly individuals usually consume lower purine diets and pay more  
41  
42 attention to health-related diets and behaviors compared to younger individuals.  
43  
44

45  
46 Effective diet control can reduce serum uric acid by 60~70 $\mu$ mol/L, which can  
47  
48 partially explain the relationship between age and serum uric acid. Second, the  
49  
50 association between urbanicity and HUA only exists in men after adjusting  
51  
52 cardiometabolic and health-related behavioral risk factors. Females tend to  
53  
54 smoke less, drink less, and be more inactive compared with males, thus their  
55  
56 uric acid level is less influenced by urbanicity. Third, the association in the  
57  
58  
59  
60

1  
2  
3  
4 female group could be unavoidably affected because a fair amount of smoking  
5  
6 data was missing. Fourth, even with self-reported history and physical and  
7  
8 laboratory examination, the real prevalence of hypertension and diabetes  
9  
10 mellitus might be under-reported. Finally, the population we analyzed was  
11  
12 derived from China, and global data is needed to generalize the result.  
13  
14

15  
16 In conclusion, living in highly urbanized areas is linked with higher risk of  
17  
18 hyperuricemia independent of health-related behavioral and cardiometabolic  
19  
20 risk factors, especially in individuals without traditional HUA risk factors such as  
21  
22 hypertension, diabetes mellitus, obesity, and CKD.  
23  
24  
25  
26  
27  
28  
29

### 30 **Acknowledgements**

31  
32 We would like to acknowledge the team of the National Institute for Nutrition  
33  
34 and Health, Chinese Center for Disease Control and Prevention, the Carolina  
35  
36 Population Center, University of North Carolina at Chapel Hill, and the China–  
37  
38 Japan Friendship Hospital, Ministry of Health who conducted the China Health  
39  
40 and Nutrition Survey 2009. And we also acknowledge all the participants  
41  
42 included in this study.  
43  
44  
45  
46  
47  
48  
49

### 50 **Ethics**

51  
52 The CHNS was approved by the Institutional Review Board at the University of  
53  
54 North Carolina at Chapel Hill, the China-Japan Friendship Hospital and the  
55  
56 Chinese Center for Disease Control and Prevention's National Institute for  
57  
58  
59  
60



1  
2  
3  
4 Nutrition and Health. All subjects gave informed consent for participation. The  
5  
6 access to the data with approved by the above Institutional Review Board. The  
7  
8 analysis of the data presented in this paper was approved by the Ethics  
9  
10 Committee of Zhongshan Hospital, Fudan University (B2018-166).  
11  
12  
13  
14  
15  
16

### 17 **Patient and Public Involvement statement**

18  
19 Patients and public had not been involved in the development of the research  
20  
21 question or in the design of the study. Patients had received oral and written  
22  
23 information about this research; however, they were not involved in the  
24  
25 recruitment and conduct of the study. After signing informed consent, they were  
26  
27 assessed for eligibility, and data collection began. Dissemination of the general  
28  
29 results (no personal data) were approved only after the CHNS Review Board  
30  
31 qualified the application.  
32  
33  
34  
35  
36  
37  
38  
39  
40

### 41 **Contributors**

42  
43 Zhang Xiaoyan and Ding Xiaoqiang were co-investigators and supervisors of  
44  
45 the study. Yu Xixi carried out the study design, the data analysis and paper  
46  
47 writing. Zhu Cheng provided the original idea of the paper, the original writing  
48  
49 idea of the paper and played a vital role in revised submission. Zhang Han and  
50  
51 Chen Jing served as scientific advisors and supervised data analysis. Shen  
52  
53 Ziyang and Gu Yulu polished the article. Lv Shiqi, Zhang Di and Wang Yulin  
54  
55  
56  
57  
58  
59  
60

1  
2  
3  
4 collected the data. All authors were involved in writing the paper and had final  
5  
6 approval of the submitted and published versions.  
7  
8  
9

### 10 11 **Data sharing statement.**

12  
13  
14 The datasets analyzed in the current study are available online  
15  
16 (<https://www.cpc.unc.edu/projects/china>).  
17  
18  
19

### 20 21 22 **Competing Interests: None declared.**

### 23 24 25 26 27 **Funding**

28  
29 This study was supported by research grants from the Ministry of Science and  
30  
31 Technology of People's Republic of China (2016YFC1305500), Shanghai  
32  
33 Municipal Health Commission (2017ZZ01015), and the China National Natural  
34  
35 Scientific Foundation (81700646 and 81970637). The funders had no roles in  
36  
37 study design, data collection and analysis, decision to publish, or preparation  
38  
39 of the manuscript.  
40  
41  
42  
43  
44  
45  
46  
47  
48  
49

### 50 51 **References**

- 52  
53 1 Zhu Y, Pandya BJ, Choi HK. Prevalence of gout and hyperuricemia in the US general  
54  
55 population: The National Health and Nutrition Examination Survey 2007–2008. *Arthritis Rheum*  
56  
57 2011;**63**:3136–41.  
58  
59  
60

- 1  
2  
3  
4 2 Liu R, Han C, Wu D, *et al*. Prevalence of Hyperuricemia and Gout in Mainland China from  
5  
6 2000 to 20 14: A Systematic Review and Meta-Analysis. *BioMed Research*  
7  
8 *International*;2015:1-12.  
9  
10  
11 3 Li L, Yang C, Zhao Y, *et al*. Is hyperuricemia an independent risk factor for new-onset  
12  
13 chronic kidney disease?: a systematic review and meta-analysis based on observational  
14  
15 cohort studies. *BMC Nephrol*;15.  
16  
17  
18 4 Weiner DE, Tighiouart H, Elsayed EF, *et al*. Uric Acid and Incident Kidney Disease in the  
19  
20 Community. *J Am Soc Nephrol*;19:1204-11.  
21  
22  
23 5 Duk-Hee K. A role for uric acid in the progression of renal disease. *Journal of the American*  
24  
25 *Society of Nephrology : JASN*2002;12.  
26  
27  
28 6 Kunitoshi I. Significance of hyperuricemia as a risk factor for developing ESRD in a  
29  
30 screened cohort. *American journal of kidney diseases : the official journal of the National Kidney*  
31  
32 *Foundation* 2004;4.  
33  
34  
35 7 Sluijs I, Beulens JWJ, van der A DL, *et al*. Plasma Uric Acid Is Associated with Increased  
36  
37 Risk of Type 2 Diabetes Independent of Diet and Metabolic Risk Factors. *The Journal of*  
38  
39 *Nutrition* 2012;143:80-5.  
40  
41  
42 8 Kansui Y, Matsumura K, Morinaga Y, *et al*. Impact of serum uric acid on incident  
43  
44 hypertension in a worksite population of Japanese men. *J Hypertens*;36:1499-505.  
45  
46  
47 9 Peng T-C, Wang C-C, Kao T-W, *et al*. Relationship between hyperuricemia and lipid  
48  
49 profiles in US adults. *BioMed Research International* 2015;2015:127596-.  
50  
51  
52 10 Kleber ME, Delgado G, Grammer TB, *et al*. Uric Acid and Cardiovascular Events: A  
53  
54 Mendelian Randomization Study. *J Am Soc Nephrol*;26:2831-8.  
55  
56  
57  
58  
59  
60

- 1  
2  
3  
4 11 Feig DI, Kang D-H, Johnson RJ. Uric Acid and Cardiovascular Risk. *N Engl J Med*  
5  
6 2008;**359**:1811-21.  
7  
8  
9 12 Vlahov D, Galea S. Urbanization, urbanicity, and health. *Journal of urban health : bulletin*  
10  
11 *of the New York Academy of Medicine* 2002;**79**:S1-S12.  
12  
13  
14 13 Gong P, Liang S, Carlton EJ, *et al.* Urbanisation and health in China. *The Lancet*  
15  
16 2012;**379**:843-52.  
17  
18  
19 14 Tang Y-X, Bloom MS, Qian Z, *et al.* Association between ambient air pollution and  
20  
21 hyperuricemia in traffic police officers in China: a cohort study. *Int J Environ Health Res* 2019:1-  
22  
23 9.  
24  
25  
26  
27 15 Nakamura K, Sakurai M, Miura K, *et al.* Alcohol intake and the risk of hyperuricaemia: A  
28  
29 6-year prospective study in Japanese men. *Nutrition, Metabolism and Cardiovascular Diseases*  
30  
31 2012;**22**:989-96.  
32  
33  
34  
35 16 Yang T, Zhang Y, Wei J, *et al.* Relationship between cigarette smoking and hyperuricemia  
36  
37 in middle-aged and elderly population: a cross-sectional study. *Rheumatol Int* 2016;**37**:131-6.  
38  
39  
40 17 Liu, Li, Zhang, *et al.* Relationship between lifestyle choices and hyperuricemia in Chinese  
41  
42 men;and women. *Clin Rheumatol* 2013;**32**:233-9.  
43  
44  
45  
46 18 Veronese N, Stubbs B, Trevisan C, *et al.* Results of an Observational Cohort Study of  
47  
48 Hyperuricemia as a Predictor of Poor Physical Performance in the Elderly. *Arthritis Care Res*  
49  
50 *(Hoboken)* 2017;**69**:1238-44.  
51  
52  
53  
54 19 Cicero AFG, Fogacci F, Desideri G, *et al.* Arterial Stiffness, Sugar-Sweetened Beverages  
55  
56 and Fruits Intake in a Rural Population Sample: Data from the Brisighella Heart Study. *Nutrients*  
57  
58 2019;**11**.  
59  
60

- 1  
2  
3  
4 20 Wang S, Chen R, Liu Q, *et al.* Prevalence, awareness and treatment of chronic kidney  
5  
6 disease among middle-aged and elderly: The China Health and Retirement Longitudinal Study.  
7  
8  
9 *Nephrology* 2015;**20**:474-84.  
10  
11  
12 21 Kaze FF, Meto DT, Halle M-P, *et al.* Prevalence and determinants of chronic kidney  
13  
14 disease in rural and urban Cameroonians: a cross-sectional study. *BMC Nephrol* 2015;**16**:117.  
15  
16  
17 22 Sorensen LB. Role of the intestinal tract in the elimination of uric acid.  
18  
19  
20 23 Krishnan E. Reduced glomerular function and prevalence of gout: NHANES 2009-10.  
21  
22  
23 24 Madero M, Sarnak MJ, Wang X, *et al.* Uric Acid and Long-term Outcomes in CKD. *Am J*  
24  
25 *Kidney Dis*;**53**:796-803.  
26  
27  
28 25 Popkin BM, Du S, Zhai F, *et al.* Cohort Profile: The China Health and Nutrition Survey--  
29  
30 monitoring and understanding socio-economic and health change in China, 1989-2011. *Int J*  
31  
32 *Epidemiol*;**39**:1435-40.  
33  
34  
35 26 Jones-Smith JC, Popkin BM. Understanding community context and adult health changes  
36  
37 in China: Development of an urbanicity scale. *Soc Sci Med* 2010;**71**:1436-46.  
38  
39  
40 27 DeVellis R. *Scale Development: Theory and Applications* 1991.  
41  
42  
43 28 Dahly MDL, Adair LS. Quantifying the urban environment: a scale measure of urbanicity  
44  
45 outperforms the urban-rural dichotomy. *other* 2007;**64**.  
46  
47  
48 29 Thompson AL, Houck KM, Adair L, *et al.* Multilevel examination of the association of  
49  
50 urbanization with inflammation in Chinese adults. *Health & Place*;**28**:177-86.  
51  
52  
53 30 Becker MA, Schumacher HR, Wortmann RL, *et al.* Febuxostat Compared with Allopurinol  
54  
55 in Patients with Hyperuricemia and Gout. *N Engl J Med* 2005;**353**:2450-61.  
56  
57  
58  
59  
60

- 1  
2  
3  
4 31 Zhang W, Doherty M, Pascual E, *et al*. EULAR evidence based recommendations for gout.  
5  
6  
7 Part I: Diagnosis. Report of a task force of the standing committee for international clinical  
8  
9  
10 studies including therapeutics (ESCISIT). *Ann Rheum Dis* 2006;**65**:1301.
- 11  
12 32 Perez-Ruiz F, Lioté F. Lowering serum uric acid levels: What is the optimal target for  
13  
14 improving clinical outcomes in gout? *Arthritis Care Res (Hoboken)* 2007;**57**:1324-8.
- 15  
16  
17 33 Williams B, G M, W S, *et al*. [2018 ESC/ESH Guidelines for the management of arterial  
18  
19 hypertension]. *Eur Heart J* 2019;**77**:71.
- 20  
21  
22 34 5. Lifestyle Management: &em& Standards of Medical Care in Diabetes—  
23  
24 2019&em&. *Diabetes Care* 2019;**42**:S46.
- 25  
26  
27 35 Mach F, Baigent C, Catapano A, *et al*. 2019 ESC/EAS guidelines for the management of  
28  
29 dyslipidaemias: Lipid modification to reduce cardiovascular risk. *Atherosclerosis* 2019.
- 30  
31  
32 36 Andrassy KM. Comments on 'KDIGO 2012 Clinical Practice Guideline for the Evaluation  
33  
34 and Management of Chronic Kidney Disease'. *Kidney Int* 2013;**84**:622-3.
- 35  
36  
37 37 Zhou BF. Effect of Body Mass Index on All-cause Mortality and Incidence of  
38  
39 Cardiovascular Diseases—Report for Meta-Analysis of Prospective Studies on Optimal Cut-off  
40  
41 Points of Body Mass Index in Chinese Adults. *Biomed Environ Sci* 2002;**15**:245.
- 42  
43  
44 38 Ainsworth BE, Haskell WL, Whitt MC, *et al*. Compendium of Physical Activities: an Update  
45  
46 of Activity Codes and MET Intensities. *Med Sci Sports Exerc* 2000;**32**:S498-504.
- 47  
48  
49 39 Ng SW, Norton EC, Popkin BM. Why have physical activity levels declined among Chinese  
50  
51 adults? Findings from the 1991–2006 China health and nutrition surveys. *Soc Sci Med*  
52  
53  
54  
55  
56 2009;**68**:1305-14.  
57  
58  
59  
60

- 1  
2  
3  
4 40 Sallis JF, Haskell WL, Wood PD, *et al.* Physical activity assessment methodology in the  
5  
6 Five-City Project. *Am J Epidemiol* 1985;**121**:91-106.  
7  
8  
9 41 Xu W, Sun J, Liu Y, *et al.* Spatiotemporal variation and socioeconomic drivers of air  
10  
11 pollution in China during 2005–2016. *J Environ Manage*;**245**:66-75.  
12  
13  
14 42 Zhang L, Liu L, Zhao Y, *et al.* Source attribution of particulate matter pollution over North  
15  
16 China with the adjoint method. *Environmental Research Letters* 2015;**10**:084011.  
17  
18  
19 43 Han L, Zhou W, Pickett STA, *et al.* An optimum city size? The scaling relationship for urban  
20  
21 population and fine particulate (PM 2.5 ) concentration. *Environmental Pollution*;**208**:96-101.  
22  
23  
24 44 Luo K, Li G, Fang C, *et al.* PM2.5 mitigation in China: Socioeconomic determinants of  
25  
26 concentrations and differential control policies. *J Environ Manage* 2018;**213**:47-55.  
27  
28  
29 45 Xu B, Lin B. What cause large regional differences in PM2.5 pollutions in China? Evidence  
30  
31 from quantile regression model. *Journal of Cleaner Production* 2018;**174**:447-61.  
32  
33  
34 46 Wang W, Wu C, Mu Z, *et al.* Effect of ambient air pollution exposure on renal dysfunction  
35  
36 among hospitalized patients in Shanghai, China. *Public Health*;**181**:196-201.  
37  
38  
39 47 Jung-Wei C, Horng-Yih O, Hsiu-Ling C, *et al.* Hyperuricemia after exposure to  
40  
41 polychlorinated dibenzo-p-dioxins and dibenzofurans near a highly contaminated area.  
42  
43  
44  
45  
46  
47  
48  
49 48 Monda KL, Gordon-Larsen P, Stevens J, *et al.* China's transition: The effect of rapid  
50  
51 urbanization on adult occupational physical activity. *Soc Sci Med* 2007;**64**:858-70.  
52  
53  
54 49 Giuseppe L, Giorgio B, Massimo F, *et al.* Comparison of serum creatinine, uric acid,  
55  
56 albumin and glucose in male professional endurance athletes compared with healthy controls.  
57  
58  
59  
60  
*Clin Chem Lab Med* 2004;**42**:644-7.

1  
2  
3  
4 50 Shi M, Wang X, Yamanaka T, *et al*. Effects of anaerobic exercise and aerobic exercise on  
5  
6 biomarkers of oxidative stress. *Environ Health Prev Med* 2007;**12**:202-8.  
7

8  
9 51 Inoue Y, Howard AG, Thompson AL, *et al*. The association between urbanization and  
10  
11 reduced renal function: findings from the China Health and Nutrition Survey. *BMC Nephrol*  
12  
13 2017;**18**:160.  
14  
15

16  
17 52 Ali N, Mahmood S, Islam F, *et al*. Relationship between serum uric acid and hypertension:  
18  
19 a cross-sectional study in Bangladeshi adults. *Sci Rep* 2019;**9**:9061.  
20  
21  
22  
23  
24  
25  
26  
27  
28  
29  
30  
31  
32  
33  
34  
35  
36  
37  
38  
39  
40  
41  
42  
43  
44  
45  
46  
47  
48  
49  
50  
51  
52  
53  
54  
55  
56  
57  
58  
59  
60



**Table 1 Basic characteristics of participants according to community-level urbanization index**

| Variables                                             | Low urbanized  | Medium urbanized | Highly urbanized | P value |
|-------------------------------------------------------|----------------|------------------|------------------|---------|
| <b>Number</b>                                         | 3554           | 2162             | 2863             |         |
| <b>SUA, mean (SD), <math>\mu\text{mol/L}</math></b>   | 5.02(1.69)     | 5.16(1.75)       | 5.42 (1.87)      | <0.001  |
| <b>HUA, n (%)</b>                                     | 435(12.2)      | 316(14.6)        | 567(19.8)        | <0.001  |
| <b>Age, mean (SD), year</b>                           | 50.29(14.76)   | 50.50(14.94)     | 52.15(15.37)     | <0.001  |
| <b>Male, n (%)</b>                                    | 1696(47.7)     | 1020(47.2)       | 1327(46.3)       | 0.549   |
| <b>Hypertension, n (%)</b>                            | 1169(32.9)     | 753(34.8)        | 1069(37.3)       | 0.001   |
| <b>DM, n (%)</b>                                      | 296(8.3)       | 258(11.9)        | 374(13.1)        | <0.001  |
| <b>High LDL-c, n (%)</b>                              | 1209(34.6)     | 1000(46.3)       | 1261(44.0)       | <0.001  |
| <b>Obesity, n (%)</b>                                 | 298(8.4)       | 212(9.8)         | 312(10.9)        | <0.001  |
| <b>eGFR, mean (SD), mL/min per 1.73 m<sup>2</sup></b> | 81.98(16.46)   | 78.71(16.88)     | 76.57(16.94)     | <0.001  |
| <b>CKD, n (%)</b>                                     | 307(8.6)       | 255(11.8)        | 437(15.3)        | <0.001  |
| <b>Smoking, n (%)</b>                                 | 1108(31.2)     | 558(25.8)        | 708(24.7)        | <0.001  |
| <b>Drinking, n (%)</b>                                | 791(22.3)      | 458(21.2)        | 536(18.7)        | <0.001  |
| <b>Physical activity, mean (SD), METs</b>             | 125.48(123.73) | 81.53(101.49)    | 51.71(72.26)     | <0.001  |

Continuous variables were expressed as the mean  $\pm$  SD and categorical variables were described as frequencies and percentages. The one-way ANOVA test (for continuous

variables) and  $\chi^2$  tests (for categorical variables) were used to compare the difference between different group. SUA, serum uric acid; HUA: hyperuricemia; DM, Diabetes mellitus;

LDL, low-density lipoprotein; eGFR, estimated glomerular filtration rate; CKD chronic kidney disease; MET, metabolic equivalent for task.

**Table 2 Factors associated with serum uric acid among Chinese adults.**

|                                                             | Univariable         |                | Multivariable       |                         |
|-------------------------------------------------------------|---------------------|----------------|---------------------|-------------------------|
|                                                             | $\beta$ coefficient | <i>P</i> value | $\beta$ coefficient | Adjusted <i>P</i> value |
| <b>Age (every 10 years)</b>                                 | 0.019               | <0.001         | -0.028              | <0.001                  |
| <b>Gender (male vs. female)</b>                             | 0.287               | <0.001         | 0.290               | <0.001                  |
| <b>Hypertension (yes vs. no)</b>                            | 0.110               | <0.001         | 0.047               | <0.001                  |
| <b>DM (yes vs. no)</b>                                      | 0.124               | <0.001         | 0.067               | <0.001                  |
| <b>High LDL-c (yes vs. no)</b>                              | 0.031               | <0.001         | 0.004               | 0.743                   |
| <b>Obesity (yes vs. no)</b>                                 | 0.133               | <0.001         | 0.089               | <0.001                  |
| <b>CKD (yes vs. no)</b>                                     | 0.195               | <0.001         | 0.198               | <0.001                  |
| <b>Smoking (yes vs. no)</b>                                 | -0.018              | 0.307          | -                   | -                       |
| <b>Drinking (yes vs. no)</b>                                | 0.063               | <0.001         | 0.037               | 0.001                   |
| <b>Physical activity (every 10 METs)</b>                    | <0.001              | 0.700          | -                   | -                       |
| <b>Community-level urbanization index (every 10 points)</b> | 0.016               | <0.001         | 0.016               | <0.001                  |

The  $\beta$  coefficients and *P* values are from univariable and multivariable linear regression models of natural log-transformed uric acid as the dependent variable. The multivariable model included all covariates. DM, diabetes mellitus; LDL-c, low-density lipoprotein cholesterol; CKD, chronic kidney disease; MET, metabolic equivalent for task; –, without significance.

**Table 3 Association of urbanization and the risk of hyperuricemia among Chinese adults**

| Variables                        | Low urbanized | Medium urbanized   | Highly urbanized   |
|----------------------------------|---------------|--------------------|--------------------|
| hyperuricemia (%)                | 12.2          | 14.6               | 19.8               |
| P <sup>1</sup>                   |               | 0.009              | <0.001             |
| Odds ratio (95% CI) <sup>1</sup> | Ref.          | 1.234(1.055-1.445) | 1.767(1.539-2.028) |
| P <sup>2</sup>                   |               | 0.218              | <0.001             |
| Odds ratio (95% CI) <sup>2</sup> | Ref.          | 1.109(0.941-1.308) | 1.548(1.339-1.789) |
| P <sup>3</sup>                   |               | 0.363              | 0.001              |
| Odds ratio (95% CI) <sup>3</sup> | Ref.          | 1.160(0.842-1.599) | 1.661(1.246-2.212) |

<sup>1</sup>Model 1 was only controlled by age, gender.<sup>2</sup>Model 2 was controlled by hypertension, diabetes mellitus and high low-density lipoprotein, obesity and chronic kidney disease

based on Model 1.<sup>3</sup>Model 3 was controlled by health-related behaviors (smoking, drinking, physical activity) based on Model 2.

1  
2  
3  
4  
5  
6  
7  
8  
9  
10  
11  
12  
13  
14  
15  
16  
17  
18  
19  
20  
21  
22  
23  
24  
25  
26  
27  
28  
29  
30  
31  
32  
33  
34  
35  
36  
37  
38  
39  
40  
41  
42  
43  
44  
45  
46

For peer review only

## Figure Legend

**Figure1** Flowchart of the sample selecting methods at each step.

**Figure2** Adjusted odds ratios for hyperuricemia with high urbanicity according to baseline characteristics. Analyses were adjusted for age, gender, hypertension, diabetes mellitus, high LDL (high low-density lipoprotein), obesity, chronic kidney disease, smoking, drinking and physical activity, as appropriate. The square black boxes represent odds ratios, and the horizontal lines represent 95% confidence intervals. The triangle black boxes represent the overall odds ratios and 95% confidence intervals

1  
2  
3  
4  
5  
6  
7  
8  
9  
10  
11  
12  
13  
14  
15  
16  
17  
18  
19  
20  
21  
22  
23  
24  
25  
26  
27  
28  
29  
30  
31  
32  
33  
34  
35  
36  
37  
38  
39  
40  
41  
42  
43  
44  
45  
46  
47  
48  
49  
50  
51  
52  
53  
54  
55  
56  
57  
58  
59  
60

For peer review only



Flowchart of the sample selecting methods at each step



Adjusted odds ratios for hyperuricemia with high urbanicity according to baseline characteristics.



STROBE Statement—Checklist of items that should be included in reports of *cross-sectional studies*

|                              | Item No | Recommendation                                                                                                                                                                                               | Page No |
|------------------------------|---------|--------------------------------------------------------------------------------------------------------------------------------------------------------------------------------------------------------------|---------|
| <b>Title and abstract</b>    | 1       | (a) Indicate the study's design with a commonly used term in the title or the abstract                                                                                                                       | 2       |
|                              |         | (b) Provide in the abstract an informative and balanced summary of what was done and what was found                                                                                                          | 3-5     |
| <b>Introduction</b>          |         |                                                                                                                                                                                                              |         |
| Background/rationale         | 2       | Explain the scientific background and rationale for the investigation being reported                                                                                                                         | 5       |
| Objectives                   | 3       | State specific objectives, including any prespecified hypotheses                                                                                                                                             | 5-6     |
| <b>Methods</b>               |         |                                                                                                                                                                                                              |         |
| Study design                 | 4       | Present key elements of study design early in the paper                                                                                                                                                      | 6-11    |
| Setting                      | 5       | Describe the setting, locations, and relevant dates, including periods of recruitment, exposure, follow-up, and data collection                                                                              | 6-8     |
| Participants                 | 6       | (a) Give the eligibility criteria, and the sources and methods of selection of participants                                                                                                                  | 6-7     |
| Variables                    | 7       | Clearly define all outcomes, exposures, predictors, potential confounders, and effect modifiers. Give diagnostic criteria, if applicable                                                                     | 9-11    |
| Data sources/<br>measurement | 8*      | For each variable of interest, give sources of data and details of methods of assessment (measurement). Describe comparability of assessment methods if there is more than one group                         | 8-11    |
| Bias                         | 9       | Describe any efforts to address potential sources of bias                                                                                                                                                    | 11      |
| Study size                   | 10      | Explain how the study size was arrived at                                                                                                                                                                    | 6-7     |
| Quantitative variables       | 11      | Explain how quantitative variables were handled in the analyses. If applicable, describe which groupings were chosen and why                                                                                 | 11      |
| Statistical methods          | 12      | (a) Describe all statistical methods, including those used to control for confounding                                                                                                                        | 8-11    |
|                              |         | (b) Describe any methods used to examine subgroups and interactions                                                                                                                                          | 11      |
|                              |         | (c) Explain how missing data were addressed                                                                                                                                                                  | 11      |
|                              |         | (d) If applicable, describe analytical methods taking account of sampling strategy                                                                                                                           | 11      |
|                              |         | (e) Describe any sensitivity analyses                                                                                                                                                                        | 11      |
| <b>Results</b>               |         |                                                                                                                                                                                                              |         |
| Participants                 | 13*     | (a) Report numbers of individuals at each stage of study—eg numbers potentially eligible, examined for eligibility, confirmed eligible, included in the study, completing follow-up, and analysed            | 6-7     |
|                              |         | (b) Give reasons for non-participation at each stage                                                                                                                                                         | 6-7     |
|                              |         | (c) Consider use of a flow diagram                                                                                                                                                                           | 7       |
| Descriptive data             | 14*     | (a) Give characteristics of study participants (eg demographic, clinical, social) and information on exposures and potential confounders                                                                     | 12      |
|                              |         | (b) Indicate number of participants with missing data for each variable of interest                                                                                                                          | 7       |
| Outcome data                 | 15*     | Report numbers of outcome events or summary measures                                                                                                                                                         | 12      |
| Main results                 | 16      | (a) Give unadjusted estimates and, if applicable, confounder-adjusted estimates and their precision (eg, 95% confidence interval). Make clear which confounders were adjusted for and why they were included | 12-13   |

|                          |    |                                                                                                                                                                            |       |
|--------------------------|----|----------------------------------------------------------------------------------------------------------------------------------------------------------------------------|-------|
|                          |    | (b) Report category boundaries when continuous variables were categorized                                                                                                  | 12    |
|                          |    | (c) If relevant, consider translating estimates of relative risk into absolute risk for a meaningful time period                                                           | 13    |
| Other analyses           | 17 | Report other analyses done—eg analyses of subgroups and interactions, and sensitivity analyses                                                                             | 13    |
| <b>Discussion</b>        |    |                                                                                                                                                                            |       |
| Key results              | 18 | Summarise key results with reference to study objectives                                                                                                                   | 14    |
| Limitations              | 19 | Discuss limitations of the study, taking into account sources of potential bias or imprecision. Discuss both direction and magnitude of any potential bias                 | 16-17 |
| Interpretation           | 20 | Give a cautious overall interpretation of results considering objectives, limitations, multiplicity of analyses, results from similar studies, and other relevant evidence | 14-17 |
| Generalisability         | 21 | Discuss the generalisability (external validity) of the study results                                                                                                      | 16-17 |
| <b>Other information</b> |    |                                                                                                                                                                            |       |
| Funding                  | 22 | Give the source of funding and the role of the funders for the present study and, if applicable, for the original study on which the present article is based              | 19    |

\*Give information separately for exposed and unexposed groups.

**Note:** An Explanation and Elaboration article discusses each checklist item and gives methodological background and published examples of transparent reporting. The STROBE checklist is best used in conjunction with this article (freely available on the Web sites of PLoS Medicine at <http://www.plosmedicine.org/>, Annals of Internal Medicine at <http://www.annals.org/>, and Epidemiology at <http://www.epidem.com/>). Information on the STROBE Initiative is available at [www.strobe-statement.org](http://www.strobe-statement.org).
